# Supplementary material
Source: Elsevier journal article supplement (https://cris.unibo.it/retrieve/2bcfb699-8a5e-48c9-807f-38ee4d6e9b24/mmc4.zip)
Supplement: mmc4 [file mmc1.pdf › mmc1.pdf]

# **PD-L1 and the risk of bacterial infection in patients with chronic liver diseases: An international multicohort study**

Adrià Juanola, Gabriel Mezzano, Elisa Pose, Maria José Moreta, Simone Incicco, Roberta Gagliardi, Stine Johansen, Nikolaj Torp, Mads Israelsen, Natalia Jiménez-Esquivel, Joaquin Castillo-Iturra, Jordi Ribera, Jordi Gratacós-Ginès, Anna Soria, Andrés Cárdenas, Martina Pérez-Guasch, Marta Cervera, Ruth Nadal, Queralt Herms, Marta Tonon, Torben Hansen, Evelina Stankevic, Yun Huang, Victor Vargas, Giacomo Zaccherini, Carlo Alessandria, Frank E Uschner, Ulrich Beuers, Claire Francoz, Rajeshwar P Mookerjee, Wim Laleman, Cristina Solé, Rafael Bañares, Berta Cuyàs, Xavi Ariza, Mar Coll, Isabel Graupera, Núria Fabrellas, Manuel Morales-Ruiz, Maja Thiele, Aleksander Krag, Paolo Angeli, Salvatore Piano, Elsa Solà, Pere Ginès.

Table of contents

|                            |    |
|----------------------------|----|
| Supplementary figures..... | 2  |
| Supplementary tables.....  | 11 |

## Supplementary figures

**Fig. S1.- Soluble PD-L1 (sPD-L1) levels across clinical stages of decompensated cirrhosis among patients from Cohorts 1 and 2.** Boxplots represent the interquartile range (IQR) with horizontal lines indicating the 25th and 75th percentiles. Individual dots represent patient-level sPD-L1 values. Pairwise comparisons were performed using Wilcoxon rank-sum tests.

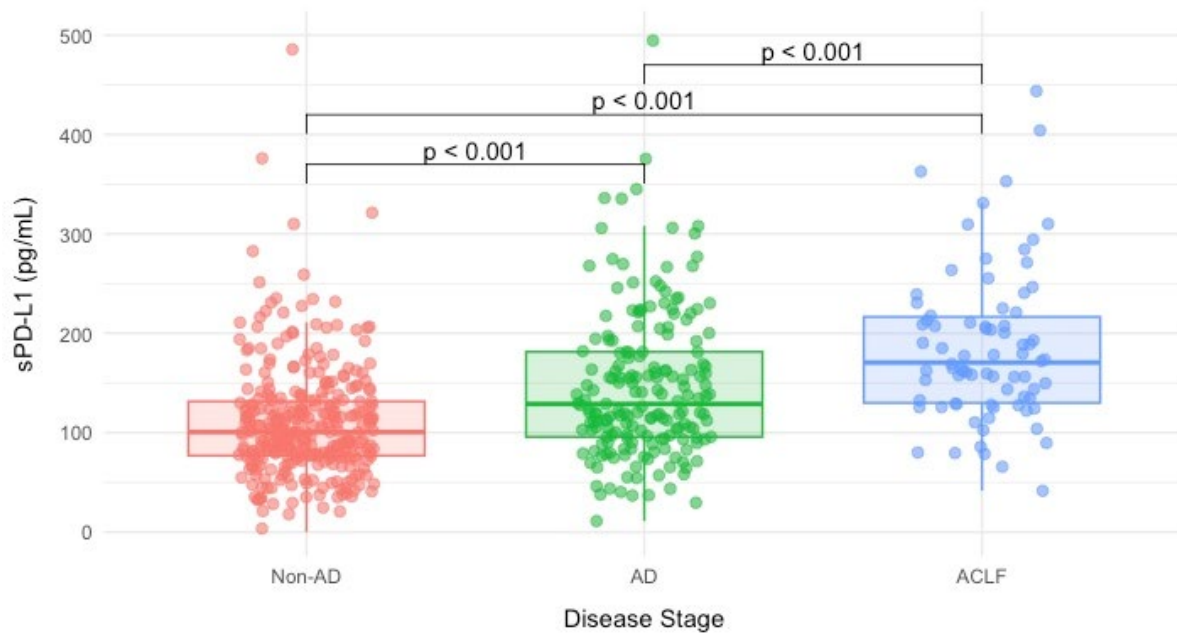

**Fig. S2.- Cumulative incidence curves of bacterial infections in patients from cohort 2 categorized according to sPD-L1 median levels.** The blue curve represents patients with sPD-L1 < 147 pg/mL, and the red curve represents those with sPD-L1 ≥ 147 pg/mL. The log-rank test was used to compare survival distributions between groups, with a statistically significant difference observed (p < 0.001). Number at risk is displayed below the time axis.

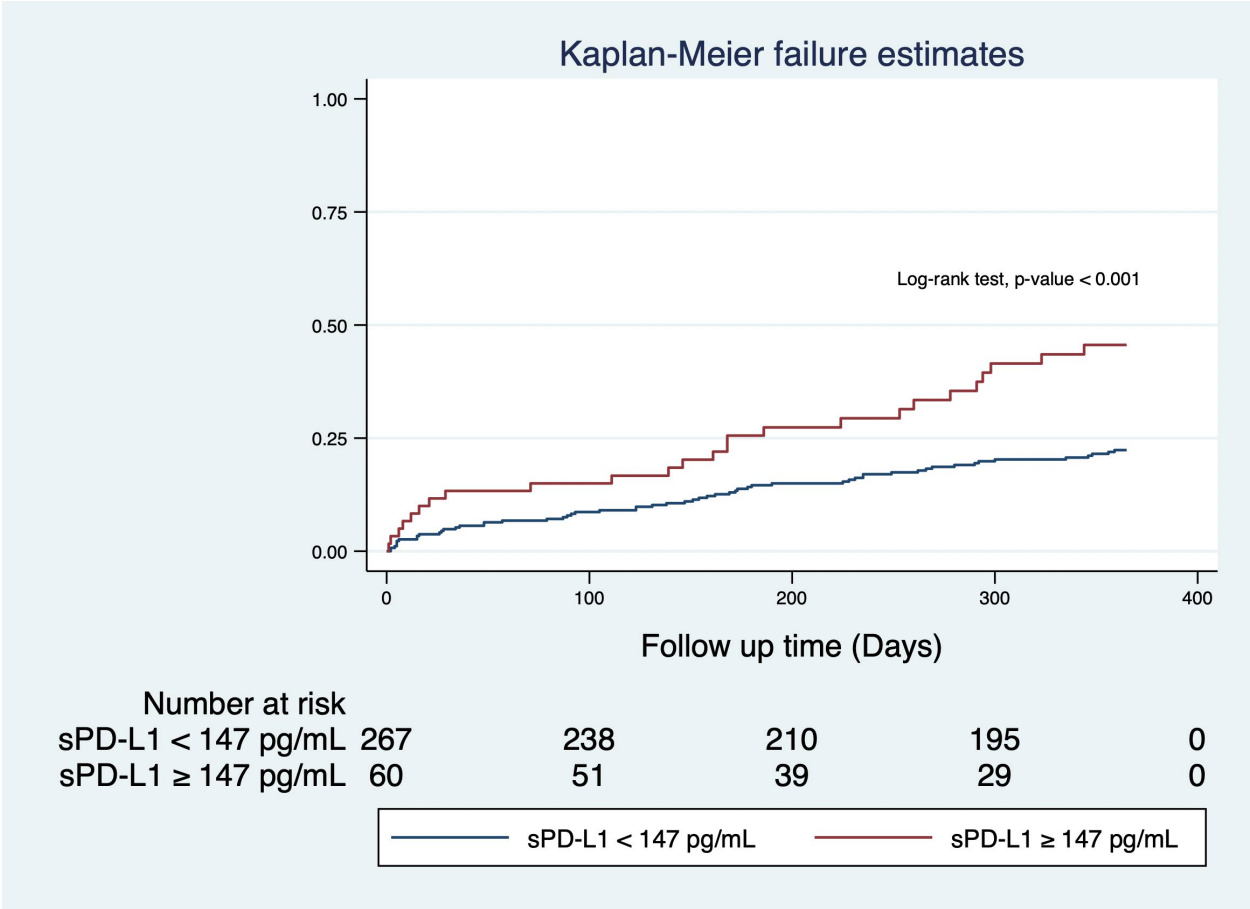

**Fig. S3.- Soluble PD-L1 adjusted HR with potential confounders identified in the univariate analysis for bacterial infection development in patients from Cohort 3.** Each diamond represents the adjusted hazard ratio (HR) of sPD-L1 when accounting for the indicated variable, based on a Cox proportional hazards model. The blue horizontal lines indicate the 95%CI for each adjusted HR. The grey dashed vertical line marks the unadjusted HR of sPD-L1, and the grey dotted lines represent its corresponding 95%CI. Variables included in this analysis were selected based on significance in the univariate analysis.

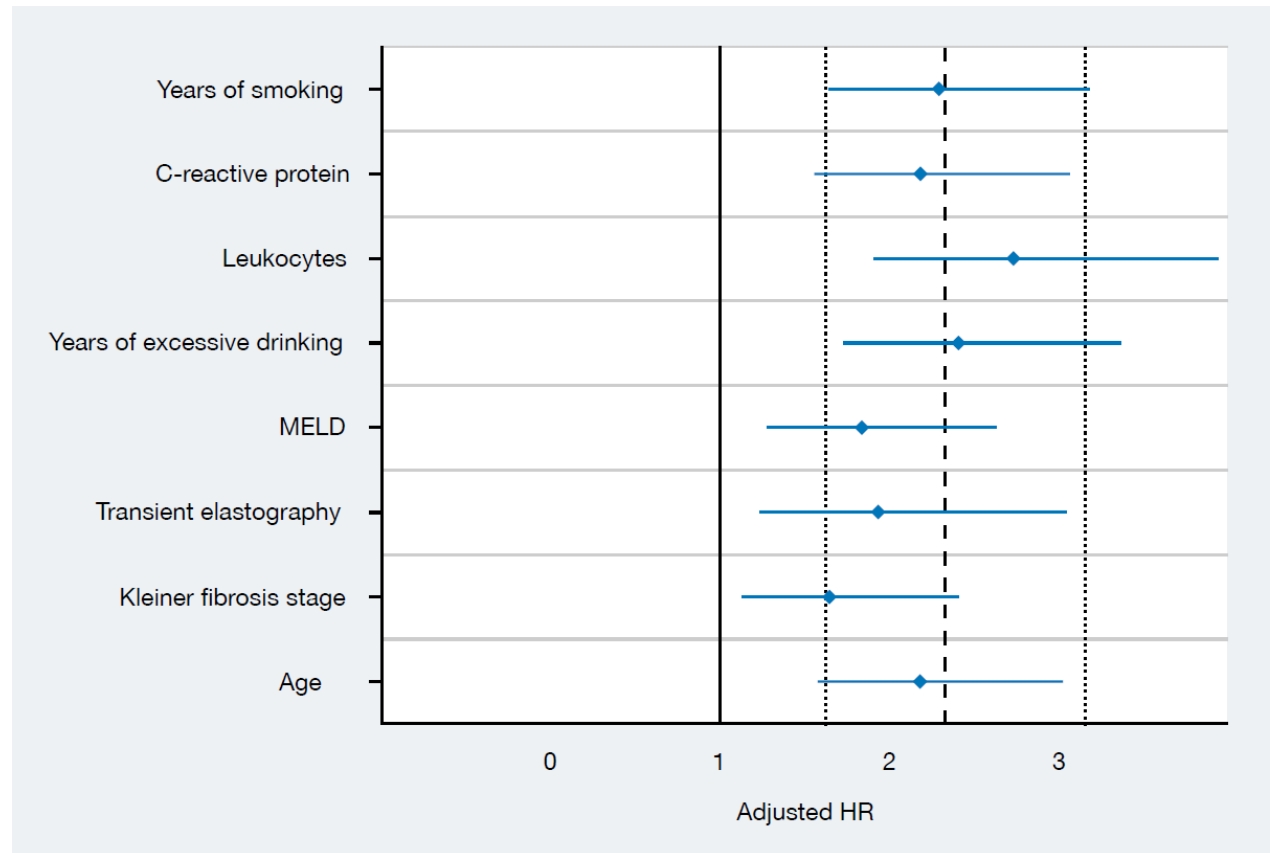

**Fig. S4.- Cumulative incidence curves of bacterial infections in patients from cohort 3 categorized according to sPD-L1 median level.** The blue curve represents patients with sPD-L1 < 5.7, and the red curve represents those with sPD-L1 ≥ 5.7. The log-rank test was used to compare survival distributions between groups, with a statistically significant difference observed ( $p < 0.001$ ). Number at risk is displayed below the time axis.

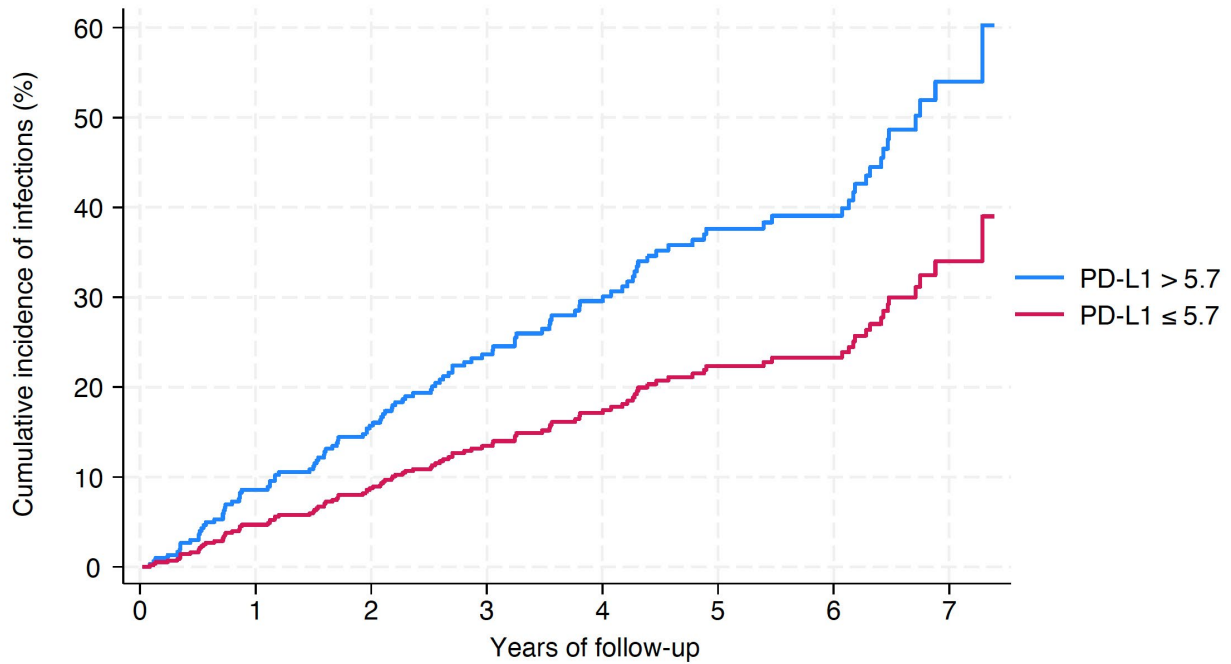

**Fig. S5.- Soluble PD-L1 adjusted HR with potential confounders identified in the univariate analysis for 90-day mortality in patients from Cohort 1.** Each diamond represents the adjusted hazard ratio (HR) of sPD-L1 when accounting for the indicated variable, based on a Cox proportional hazards model. The blue horizontal lines indicate the 95% CIs for each adjusted HR. The grey dashed vertical line marks the unadjusted HR of sPD-L1, and the grey dotted lines represent its corresponding 95% CI. Variables included in this analysis were selected based on significance in the univariate analysis.

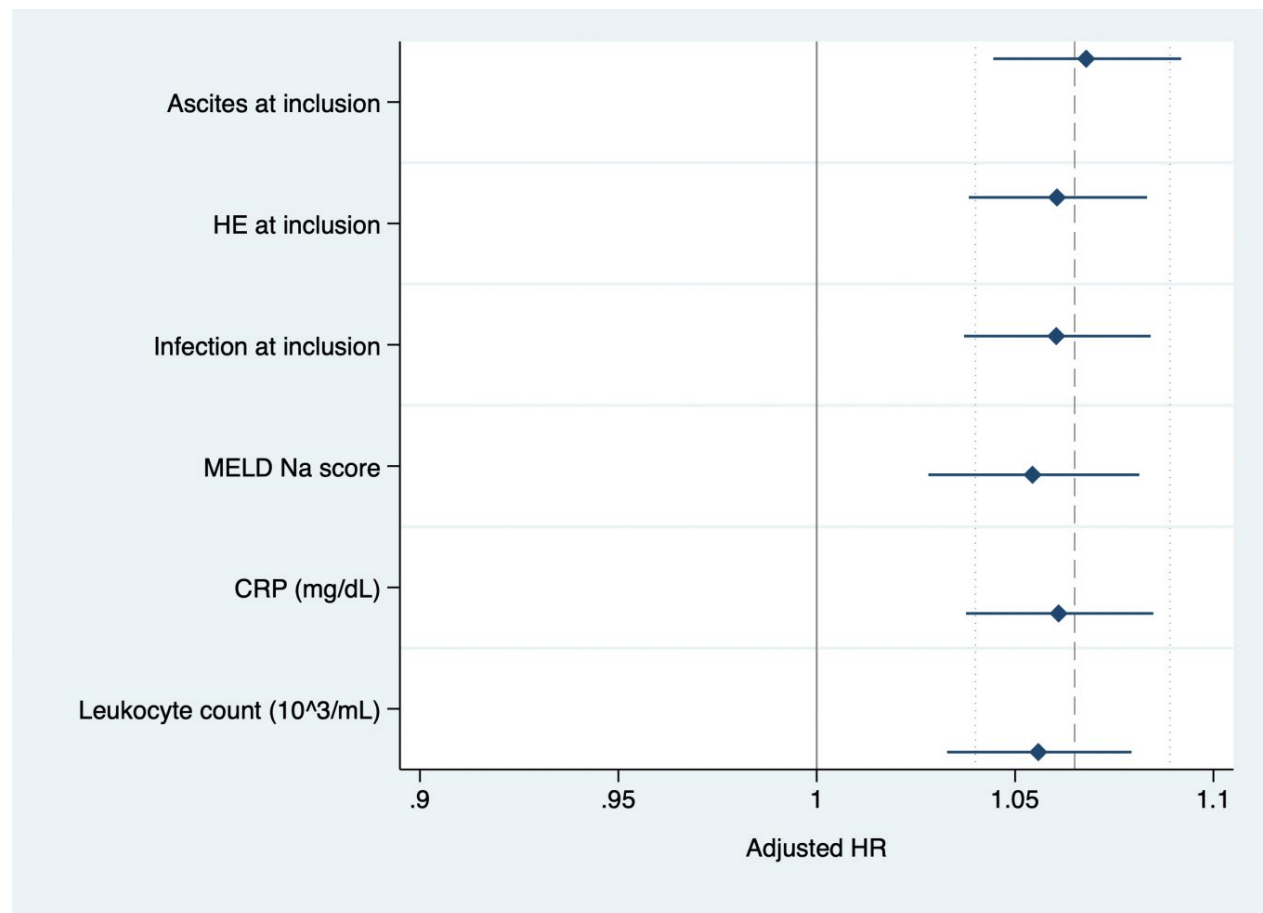

**Fig. S6.- Soluble PD-L1 adjusted HR with potential confounders identified in the univariate analysis for 1-year mortality in patients from Cohort 2.** Each diamond represents the adjusted hazard ratio (HR) of sPD-L1 when accounting for the indicated variable, based on a Cox proportional hazards model. The blue horizontal lines indicate the 95%CI for each adjusted HR. The grey dashed vertical line marks the unadjusted HR of sPD-L1, and the grey dotted lines represent its corresponding 95%CI. Variables included in this analysis were selected based on significance in the univariate analysis.

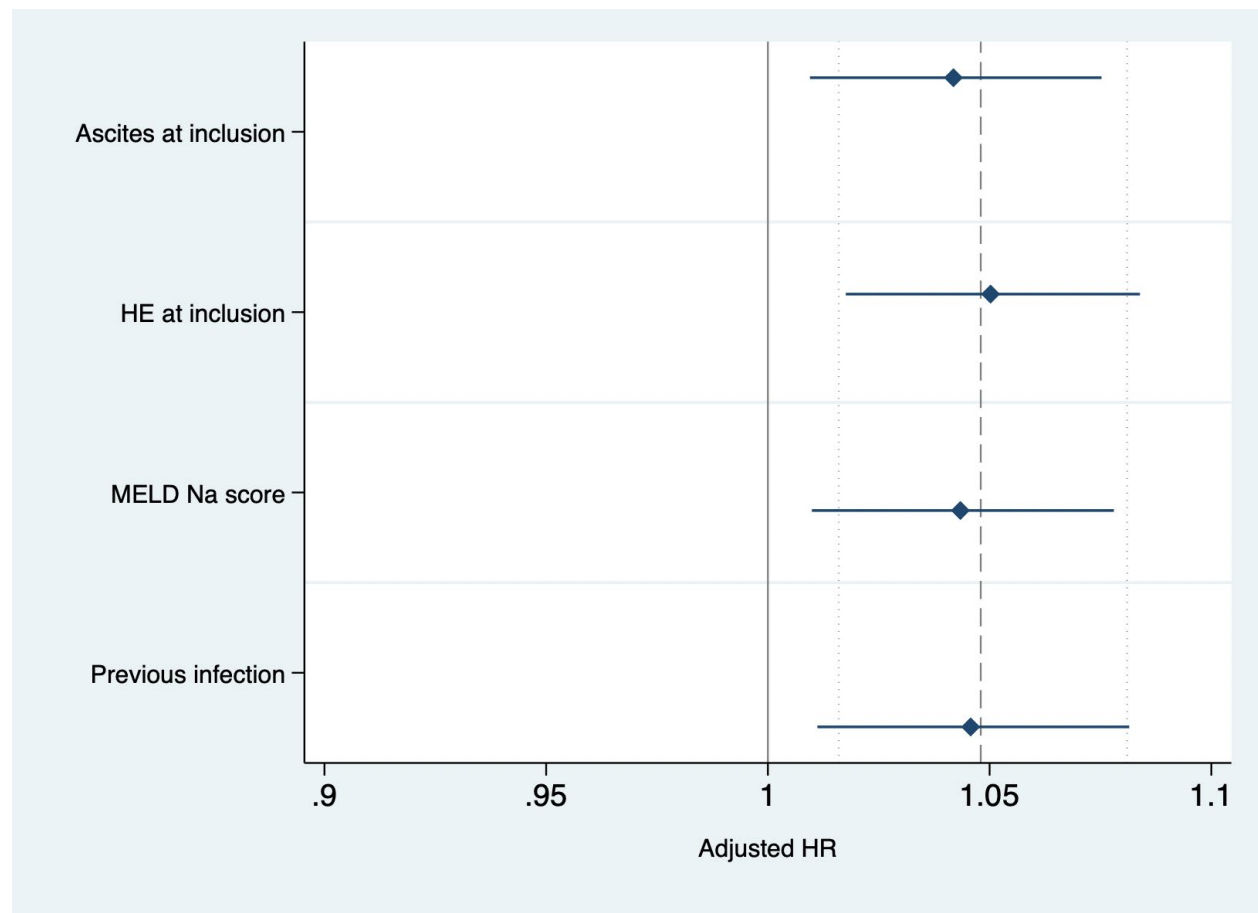

**Fig. S7.- Kaplan–Meier survival curves in patients from Cohort 2 categorized by median sPD-L1 plasma levels.** Kaplan–Meier survival estimates for 1-year mortality in patients from Cohort 2 stratified by soluble PD-L1 (sPD-L1) plasma levels using the cut-off value of 147 pg/mL. The blue curve represents patients with sPD-L1 < 147 pg/mL, and the red curve represents those with sPD-L1 ≥ 147 pg/mL. The log-rank test was used to compare survival distributions between groups, with a statistically significant difference observed (p = 0.0185). Number at risk is displayed below the time axis.

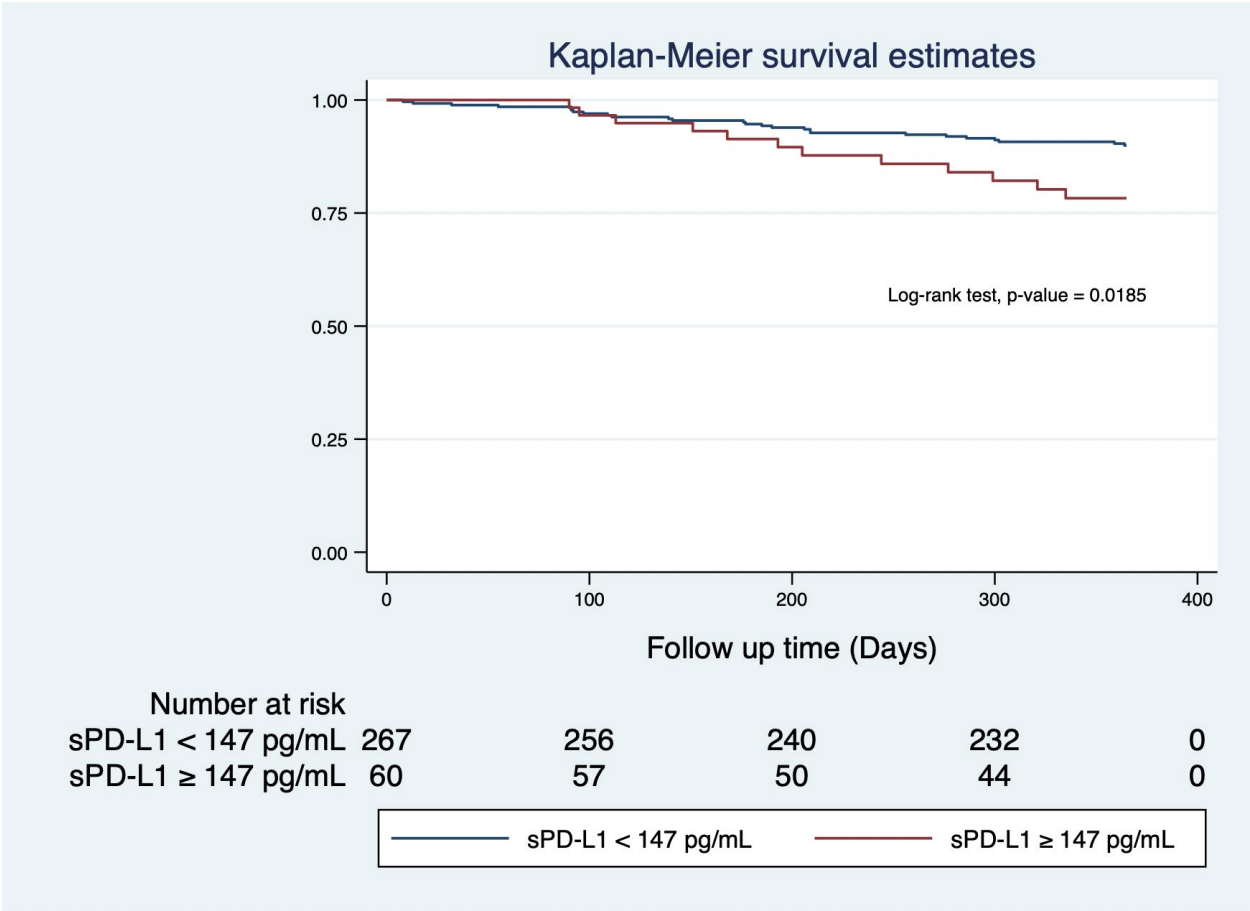



**Fig. S8.- Soluble PD-L1 adjusted HR with potential confounders identified in the univariate analysis for mortality in patients from Cohort 3.** Each diamond represents the adjusted hazard ratio (HR) of sPD-L1 when accounting for the indicated variable, based on a Cox proportional hazards model. The blue horizontal lines indicate the 95% CIs for each adjusted HR. The grey dashed vertical line marks the unadjusted HR of sPD-L1, and the grey dotted lines represent its corresponding 95%CI. Variables included in this analysis were selected based on significance in the univariate analysis.

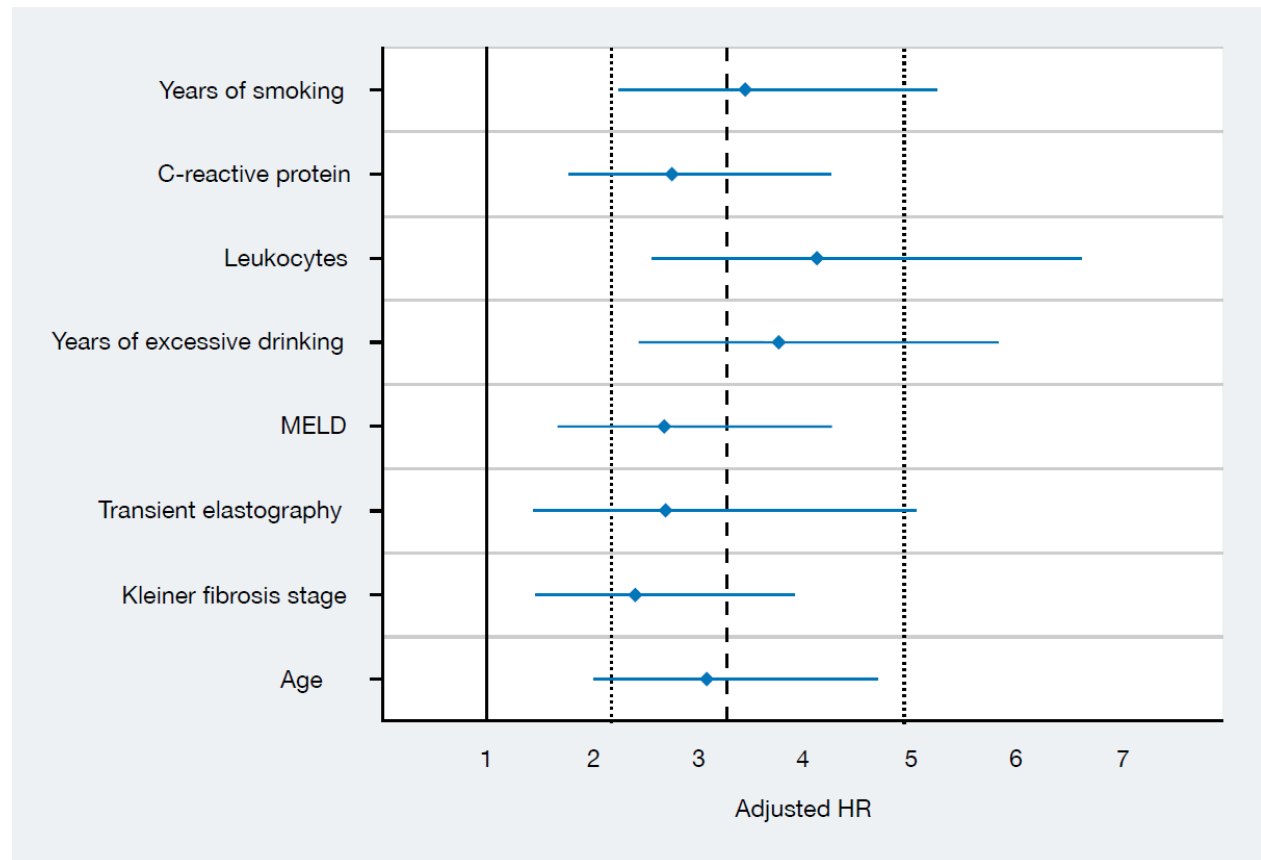

**Fig. S9.- Kaplan Meier survival curves in patients from cohort 3 categorized according to sPD-L1 median levels.** The dark blue curve represents patients with sPD-L1 < 5.7, and the light blue curve represents those with sPD-L1 ≥ 5.7. The log-rank test was used to compare survival distributions between groups, with a statistically significant difference observed (p < 0.001). Number at risk is displayed below the time axis.

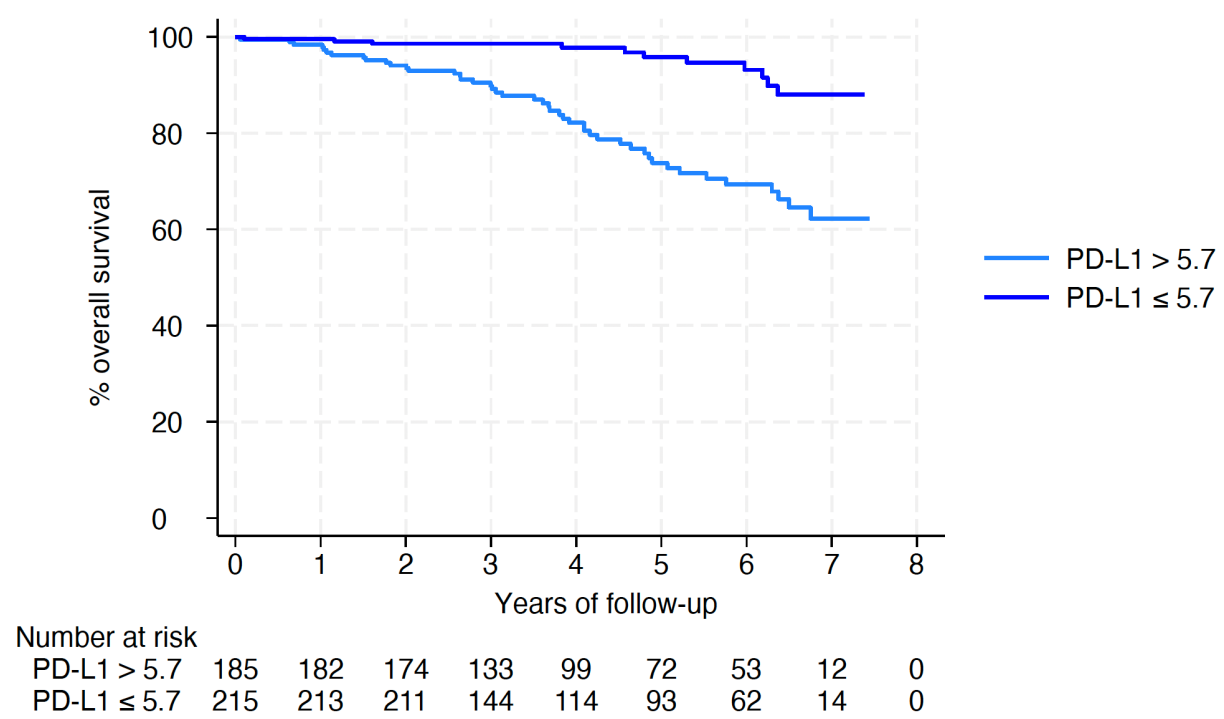

## Supplementary tables

**Table S1 – Inclusion and Exclusion Criteria for the Different Cohorts.**

| Inclusion Criteria                                                                                                                                                    | Exclusion Criteria                                                                                                                                                                                                                                                                                                                                                                                                                                                                                                                                                                                                                                                                                                                                                                                                                                                                                                                                                                                                                                           |
|-----------------------------------------------------------------------------------------------------------------------------------------------------------------------|--------------------------------------------------------------------------------------------------------------------------------------------------------------------------------------------------------------------------------------------------------------------------------------------------------------------------------------------------------------------------------------------------------------------------------------------------------------------------------------------------------------------------------------------------------------------------------------------------------------------------------------------------------------------------------------------------------------------------------------------------------------------------------------------------------------------------------------------------------------------------------------------------------------------------------------------------------------------------------------------------------------------------------------------------------------|
| <b>Cohort 1 (n = 268)</b>                                                                                                                                             |                                                                                                                                                                                                                                                                                                                                                                                                                                                                                                                                                                                                                                                                                                                                                                                                                                                                                                                                                                                                                                                              |
| Patients with decompensated cirrhosis hospitalized for management of an acute decompensation episode; or, patients with liver cirrhosis visited at outpatient clinic. | <ul style="list-style-type: none"> <li>(1) hemodialysis before admission</li> <li>(2) liver and/or kidney transplantation</li> <li>(3) admission for elective diagnostic or therapeutic procedures</li> <li>(4) advanced hepatocellular carcinoma beyond Milan criteria</li> <li>(5) severe extrahepatic diseases with poor short-term prognosis.</li> </ul>                                                                                                                                                                                                                                                                                                                                                                                                                                                                                                                                                                                                                                                                                                 |
| <b>Cohort 2: Patients from the Liverhope Efficacy Trial (n = 214)</b>                                                                                                 |                                                                                                                                                                                                                                                                                                                                                                                                                                                                                                                                                                                                                                                                                                                                                                                                                                                                                                                                                                                                                                                              |
| Patients 18 years of age or older, with a clinical diagnosis of decompensated cirrhosis, namely Child-Pugh class B or C.                                              | <ul style="list-style-type: none"> <li>(1) presence of ACLF at enrollment</li> <li>(2) serum bilirubin &gt;5 mg/dL (85.5 µmol/L)</li> <li>(3) INR ≥2.5</li> <li>(4) severe alcohol-associated hepatitis requiring corticosteroid therapy</li> <li>(5) overt HE</li> <li>(6) Child-Pugh score ≥ 13.</li> <li>(7) severe extrahepatic comorbidities, including congestive heart failure New York Heart Association Grade III/IV, chronic obstructive pulmonary disease Global Initiative for Chronic Obstructive Lung Disease group 2 or higher</li> <li>(8) serum creatinine &gt;2mg/dL (176.8 µmol/L) or on renal replacement therapy</li> <li>(9) patients on treatment with rifaximin or statins</li> <li>(10) increased risk of adverse events related to the study medications (i.e treatment with potent inhibitors of CYP3A4) or hypersensitivity to study drugs were excluded.</li> <li>(11) patients unable to provide consent or with anticipated poor compliance</li> <li>(12) alcohol consumption ≥3 units per day were also excluded.</li> </ul> |
|                                                                                                                                                                       |                                                                                                                                                                                                                                                                                                                                                                                                                                                                                                                                                                                                                                                                                                                                                                                                                                                                                                                                                                                                                                                              |

|                                                                                                                                                                                                                                                                                                                                          |                                                                                                                                                                                                                                                                                                                                                                                                                                                                                                              |
|------------------------------------------------------------------------------------------------------------------------------------------------------------------------------------------------------------------------------------------------------------------------------------------------------------------------------------------|--------------------------------------------------------------------------------------------------------------------------------------------------------------------------------------------------------------------------------------------------------------------------------------------------------------------------------------------------------------------------------------------------------------------------------------------------------------------------------------------------------------|
| <b>Cohort 2: Patients from Padova Cohort (n = 113)</b>                                                                                                                                                                                                                                                                                   |                                                                                                                                                                                                                                                                                                                                                                                                                                                                                                              |
| <p>(1) Age &gt;18 years;</p> <p>(2) Non-acute decompensated cirrhosis diagnosed by histological findings on biopsy, or by the evidence of clinical, biohumoral or instrumental data (endoscopic, ultrasound or liver stiffness measured by transient elastography);</p> <p>(3) Ability and will to provide written informed consent.</p> | <p>(1) diagnosis of hepatocellular carcinoma (HCC) or extrahepatic malignancies at the time of inclusion;</p> <p>(2) other highly disabling pathologies of extrahepatic origin at the time of inclusion (e.g. heart failure [NYHA class <math>\geq 3</math>] or GOLD chronic obstructive pulmonary disease grade <math>\geq 3</math>);</p> <p>(3) recurrence of cirrhosis after liver transplantation (LT);</p> <p>(4) refusal, or inability of the patient to provide informed consent.</p>                 |
| <b>Cohort 3: GALA-ALD cohort (n = 400)</b>                                                                                                                                                                                                                                                                                               |                                                                                                                                                                                                                                                                                                                                                                                                                                                                                                              |
| <p>(1) Age 18-75 years</p> <p>(2) Prior or current chronic alcohol overuse defined as &gt;24 g/d for women and &gt;36 g/d for men for &gt;1 year</p> <p>(3) Informed consent</p>                                                                                                                                                         | <p>(1) Previous or current decompensation<br/>Concurrent liver disease other than ALD</p> <p>(2) Cancer or other debilitating disease with an expected survival of &lt;12 months</p> <p>(3) Severe alcoholic hepatitis, hepatic congestion or bile duct dilation evidenced by ultrasound</p> <p>(4) Positive for human immunodeficiency virus</p> <p>(5) Ongoing substance abuse other than alcohol</p> <p>(6) Contraindication to a liver biopsy</p> <p>(7) Inability to comply with the study protocol</p> |

**Table S2 - Type distribution of the first bacterial infection during follow-up.**

| <b>Type of First Infection</b>           | <b>Cohort 1<br/>(n = 268)</b> | <b>Cohort 2<br/>(n = 327)</b> | <b>Cohort 3<br/>(n = 400)</b> |
|------------------------------------------|-------------------------------|-------------------------------|-------------------------------|
| <b>Urinary Tract Infection</b>           | 36 (36)                       | 15 (27)                       | 16 (15)                       |
| <b>Respiratory tract infection</b>       | 21 (21)                       | 5 (9)                         | 41 (38)                       |
| <b>Spontaneous bacteremia</b>            | 11 (11)                       | 5 (9)                         | 8 (7)                         |
| <b>Spontaneous bacterial peritonitis</b> | 9 (9)                         | 12 (22)                       | 2 (2)                         |
| <b>Skin &amp; Soft tissue infection</b>  | 9 (9)                         | 8 (15)                        | 13 (12)                       |
| <b>Other</b>                             | 15 (14)                       | 10 (18)                       | 28 (26)                       |

**Table S3.- Univariate analysis for factors associated with 3-month bacterial infection development in patients from Cohort 1.** Hazard ratios (HR) and corresponding 95% confidence intervals (CI) were estimated using Cox proportional hazards models. P-values correspond to the Wald test for the significance of each covariate.

| Variable                                            | No Infection during follow-up (n = 167) | Infection during follow-up (n = 101) | HR (95%CI)            | p value |
|-----------------------------------------------------|-----------------------------------------|--------------------------------------|-----------------------|---------|
| Age                                                 | 60 (53 - 67)                            | 60 (52 - 65)                         | 0.997 (0.980 - 1.015) | 0.764   |
| Sex                                                 | 45 (27)                                 | 28 (28)                              | 0.977 (0.632 - 1.510) | 0.916   |
| <b>Etiology</b>                                     |                                         |                                      |                       |         |
| Alcohol                                             | 102 (61)                                | 63 (62)                              | Ref.                  | Ref.    |
| HVC                                                 | 27 (16)                                 | 11 (11)                              | 0.639 (0.337 - 1.213) | 0.171   |
| Alcohol + Viral                                     | 13 (8)                                  | 8 (8)                                | 1.090 (0.522 - 2.274) | 0.819   |
| MASLD                                               | 10 (6)                                  | 12 (12)                              | 1.489 (0.802 - 2.761) | 0.207   |
| Other                                               | 15 (9)                                  | 7 (7)                                | 0.757 (0.347 - 1.654) | .0486   |
| Ascites at inclusion                                | 104 (62)                                | 75 (74)                              | 1.794 (1.147 - 2.804) | 0.010   |
| HE at inclusion                                     | 50 (30)                                 | 44 (44)                              | 1.841 (1.240 - 2.734) | 0.002   |
| Previous infection                                  | 42 (25)                                 | 48 (48)                              | 1.917 (1.296 - 2.833) | 0.001   |
| Infection at inclusion                              | 86 (52)                                 | 59 (58)                              | 1.338 (0.900 - 1.988) | 0.150   |
| Bilirubin (mg/dL)                                   | 2.4 (1.2 - 5.4)                         | 3.2 (1.6 - 9.1)                      | 1.045 (1.023 - 1.067) | <0.001  |
| INR                                                 | 1.46 (1.28 - 1.79)                      | 1.70 (1.43 - 2.03)                   | 1.168 (1.015 - 1.344) | 0.030   |
| Albumin (g/L)                                       | 29 (25 - 33)                            | 28 (25 - 32)                         | 0.986 (0.952 - 1.022) | 0.450   |
| Creatinine (mg/dL)                                  | 0.93 (0.60 - 1.45)                      | 1.17 (0.70 - 2.02)                   | 1.294 (1.135 - 1.475) | <0.001  |
| Serum Na (mEq/L)                                    | 137 (133 - 140)                         | 135 (132 - 138)                      | 0.926 (0.893 - 0.959) | <0.001  |
| Leukocyte count (10 <sup>3</sup> /mm <sup>3</sup> ) | 5.3 (3.6 - 7.8)                         | 5.9 (4.2 - 8.7)                      | 1.055 (1.021 - 1.091) | 0.001   |
| CRP (mg/dL)                                         | 1.9 (0.8 - 4.9)                         | 2.8 (1.2 - 5.1)                      | 1.037 (0.994 - 1.081) | 0.089   |
| MELD Na score                                       | 19 (15 - 25)                            | 24 (19 - 29)                         | 1.090 (1.062 - 1.118) | <0.001  |
| sPD-L1 (pg/mL)                                      | 136 (97 - 193)                          | 159 (116 - 221)                      | 1.034 (1.014 - 1.055) | 0.001   |

**Table S4.- Univariate analysis for factors associated with 1-year bacterial infection development in patients from Cohort 2.** Hazard ratios (HR) and corresponding 95% confidence intervals (CI) were estimated using Cox proportional hazards models. P-values correspond to the Wald test for the significance of each covariate.

| <b>Variable</b>                                        | <b>No Infection during follow-up (n = 245)</b> | <b>Infection during follow-up (n = 82)</b> | <b>HR (95%CI)</b>     | <b>p value</b> |
|--------------------------------------------------------|------------------------------------------------|--------------------------------------------|-----------------------|----------------|
| <b>Age</b>                                             | 58 (52 - 64)                                   | 59 (53 - 68)                               | 1.020 (0.998 - 1.042) | 0.080          |
| <b>Sex</b>                                             | 62 (25)                                        | 23 (28)                                    | 1.031 (0.637 - 1.670) | 0.900          |
| <b>Etiology</b>                                        |                                                |                                            |                       |                |
| <b>Alcohol</b>                                         | 185 (75)                                       | 48 (59)                                    | Ref.                  | Ref.           |
| <b>HVC</b>                                             | 14 (6)                                         | 9 (11)                                     | 2.102 (1.031 - 4.284) | 0.041          |
| <b>Alcohol +</b>                                       | 6 (2)                                          | 2 (2)                                      | 1.282 (0.312 - 5.276) | 0.731          |
| <b>Viral</b>                                           | 14 (6)                                         | 12 (15)                                    | 2.430 (1.288 - 4.582) | 0.006          |
| <b>MASLD</b>                                           | 26 (11)                                        | 11 (13)                                    | 1.432 (0.743 - 2.759) | 0.284          |
| <b>Other</b>                                           |                                                |                                            |                       |                |
| <b>Ascites at inclusion</b>                            | 155 (63)                                       | 71 (87)                                    | 3.287 (1.741 - 6.206) | < 0.001        |
| <b>HE at inclusion</b>                                 | 11 (4)                                         | 27 (33)                                    | 2.645 (1.363 - 5.133) | 0.004          |
| <b>Previous infection</b>                              | 35 (14)                                        | 32 (39)                                    | 3.127 (2.005 - 4.878) | < 0.001        |
| <b>Bilirubin (mg/dL)</b>                               | 1.9 (1.2 - 2.8)                                | 2.2 (1.4 - 3.4)                            | 1.237 (1.102 - 1.388) | < 0.001        |
| <b>INR</b>                                             | 1.31 (1.18 - 1.47)                             | 1.34 (1.22 - 1.44)                         | 0.879 (0.531 - 1.457) | 0.618          |
| <b>Creatinine (mg/dL)</b>                              | 0.78 (0.66 - 0.94)                             | 0.83 (0.66 - 1.05)                         | 0.987 (0.847 - 1.151) | 0.871          |
| <b>Serum Na (mEq/L)</b>                                | 138 (135 - 139)                                | 136 (134 - 138)                            | 0.937 (0.892 - 0.984) | 0.010          |
| <b>Leukocyte count (10<sup>3</sup>/mm<sup>3</sup>)</b> | 5.3 (3.9 - 6.7)                                | 4.8 (4.0 - 6.6)                            | 0.971 (0.878 - 1.073) | 0.562          |
| <b>MELD Na score</b>                                   | 13 (9 - 16)                                    | 15 (10 - 18)                               | 1.052 (1.015 - 1.089) | 0.005          |
| <b>sPD-L1 (pg/mL)</b>                                  | 92 (75 - 126)                                  | 116 (93 - 161)                             | 1.042 (1.020 - 1.066) | < 0.001        |

**Table S5 – Univariate analysis for factors associated to bacterial infection development in patients from Cohort 3.** Hazard ratios (HR) and corresponding 95% confidence intervals (CI) were estimated using Cox proportional hazards models. P-values correspond to the Wald test for the significance of each covariate.

| <b>Variable</b>                                 | <b>No Infection FU<br/>(N = 292)</b> | <b>Infection FU<br/>(N = 108)</b> | <b>HR (95%IC)</b> | <b>p value</b> |
|-------------------------------------------------|--------------------------------------|-----------------------------------|-------------------|----------------|
| <b>Age</b>                                      | 57 (50-63)                           | 59 (52-66)                        | 1.02 (1.00-1.04)  | 0.030          |
| <b>Kleiner fibrosis stage<br/>F0-1/F2/F3/F4</b> | 197/59/12/24                         | 41/29/8/30                        | 1.58 (1.36-1.85)  | <0.001         |
| <b>LSM (kPa)</b>                                | 5.6 (4.4-9)                          | 10.4 (5.7-28.4)                   | 1.03 (1.02-1.03)  | <0.001         |
| <b>Years of excessive<br/>drinking</b>          | 16 (8-26)                            | 16 (8-26)                         | 1.00 (0.99-1.02)  | 0.981          |
| <b>Years of smoking</b>                         | 25 (8-37)                            | 35 (13-45)                        | 1.01 (1.00-1.02)  | 0.064          |
| <b>MELD score</b>                               | 6 (6-7)                              | 7 (6-9)                           | 1.24 (1.15-1.34)  | <0.001         |
| <b>Leukocytes (10<sup>9</sup>/L)</b>            | 6.6 (5.2-8.0)                        | 7.0 (5.3-9.2)                     | 1.04 (0.95-1.13)  | 0.377          |
| <b>CRP (mg/L)</b>                               | 2.2 (1.0-4.7)                        | 3.1 (1.6-7.6)                     | 1.00 (0.99-1.01)  | 0.758          |
| <b>PD-L1 (NPX)</b>                              | 5.6 (5.3-5.9)                        | 5.9 (5.6-6.3)                     | 2.30 (1.67-3.16)  | <0.001         |



**Table S6 - Univariate analysis for factors associated to 3-month mortality in patients from Cohort**

1. Hazard ratios (HR) and corresponding 95% confidence intervals (CI) were estimated using Cox proportional hazards models. P-values correspond to the Wald test for the significance of each covariate.

| <b>Variable</b>                                        | <b>Alive<br/>(N = 208)</b> | <b>Dead<br/>(N = 60)</b> | <b>HR (95%IC)</b>     | <b>p value</b> |
|--------------------------------------------------------|----------------------------|--------------------------|-----------------------|----------------|
| <b>Age</b>                                             | 59 (53 - 67)               | 61 (53 - 67)             | 1.003 (0.980 - 1.026) | 0.815          |
| <b>Sex</b>                                             | 57 (27)                    | 16 (27)                  | 0.960 (0.542 - 1.701) | 0.889          |
| <b>Etiology</b>                                        |                            |                          |                       |                |
| <b>Alcohol</b>                                         | 131 (63)                   | 34 (57)                  | Ref.                  | Ref.           |
| <b>HVC</b>                                             | 29 (14)                    | 9 (15)                   | 1.100 (0.528 - 2.294) | 0.798          |
| <b>Alcohol + Viral</b>                                 | 12 (6)                     | 9 (15)                   | 2.325 (1.114 - 4.850) | 0.025          |
| <b>MASLD</b>                                           | 18 (8.5)                   | 4 (6.5)                  | 0.848 (0.301 - 2.389) | 0.755          |
| <b>Other</b>                                           | 18 (8.5)                   | 4 (6.5)                  | 0.957 (0.340 - 2.698) | 0.934          |
| <b>Ascites at inclusion</b>                            | 128 (62)                   | 51 (85)                  | 3.218 (1.584 - 6.539) | 0.001          |
| <b>HE at inclusion</b>                                 | 60 (29)                    | 34 (57)                  | 2.940 (1.763 - 4.903) | <0.001         |
| <b>Previous infection</b>                              | 71 (34)                    | 19 (32)                  | 0.851 (0.494 - 1.466) | 0.561          |
| <b>Infection at inclusion</b>                          | 104 (50)                   | 41 (68)                  | 1.984 (1.151 - 3.419) | 0.014          |
| <b>Bilirubin (mg/dL)</b>                               | 2.1 (1.2 - 4.4)            | 8.7 (3.3 - 16.3)         | 1.073 (1.051 - 1.095) | <0.001         |
| <b>INR</b>                                             | 1.46 (1.28 - 1.76)         | 2.00 (1.57 - 2.34)       | 1.318 (1.167 - 1.488) | <0.001         |
| <b>Creatinine (mg/dL)</b>                              | 0.92 (.060 - 1.44)         | 1.62 (0.99 - 2.26)       | 1.404 (1.206 - 1.636) | <0.001         |
| <b>Serum Na (mEq/L)</b>                                | 136 (134 - 140)            | 134 (127 - 137)          | 0.885 (0.848 - 0.924) | <0.001         |
| <b>Leukocyte count (10<sup>3</sup>/mm<sup>3</sup>)</b> | 5.0 (3.6 - 7.3)            | 7.9 (5.3 - 12.6)         | 1.104 (1.069 - 1.139) | <0.001         |
| <b>CRP (mg/dL)</b>                                     | 1.9 (0.8 - 4.5)            | 3.1 (1.3 - 5.6)          | 1.060 (1.009 - 1.114) | 0.021          |
| <b>MELD Na score</b>                                   | 20 (15 - 24)               | 30 (24 - 34)             | 1.162 (1.126 - 1.198) | <0.001         |
| <b>sPD-L1 (pg/mL)</b>                                  | 134 (97 - 187)             | 180 (143 - 267)          | 1.066 (1.043 - 1.089) | <0.001         |

**Table S7 - Multivariate analysis for factors associated with 90-day mortality in patients from Cohort 1.** Stepwise forward Cox analysis including factors with positive association (p value < 0.05) in the univariate analysis.

| Variable                                                | p value | HR                 | 95%CI                      |
|---------------------------------------------------------|---------|--------------------|----------------------------|
| sPD-L1 (pg/mL)                                          | < 0.001 | 1.049 <sup>#</sup> | 1.023 - 1.077 <sup>#</sup> |
| MELD sodium score                                       | < 0.001 | 1.122              | 1.090 - 1.155              |
| Leukocyte count<br>(x10 <sup>3</sup> /mm <sup>3</sup> ) | 0.004   | 1.053              | 1.016 - 1.091              |
| HE at inclusion                                         | 0.030   | 1.816              | 1.061 - 3.110              |

<sup>#</sup>HR evaluated per 10 units

CRP, C-reactive protein; HE, hepatic encephalopathy; HR, hazard ratio; MELD, model for end-stage liver disease; sPD-L1, soluble programmed death-ligand 1.

**Table S8 - Univariate analysis for factors associated to 1-year mortality in patients from Cohort 2.** Hazard ratios (HR) and corresponding 95% confidence intervals (CI) were estimated using Cox proportional hazards models. P-values correspond to the Wald test for the significance of each covariate.

| Variable             | Alive<br>(N = 289) | Dead<br>(N = 38) | HR (95%CI)            | p value |
|----------------------|--------------------|------------------|-----------------------|---------|
| Age                  | 58 (52 - 64)       | 62 (54 - 69)     | 1.032 (0.999 - 1.065) | 0.056   |
| Sex                  | 77 (27)            | 8 (21)           | 0.718 (0.329 - 1.566) | 0.405   |
| <b>Etiology</b>      |                    |                  |                       |         |
| Alcohol              | 206 (71)           | 27 (71)          | Ref.                  | Ref.    |
| HVC                  | 18 (6)             | 5 (13)           | 1.989 (0.766 - 5.165) | 0.158   |
| Alcohol + Viral      | 8 (3)              | 0 (0)            | NA                    | 1.000   |
| MASLD                | 22 (8)             | 4 (11)           | 1.401 (0.490 - 4.003) | 0.529   |
| Other                | 35 (12)            | 2 (5)            | 0.471 (0.112 - 1.981) | 0.304   |
| Ascites at inclusion | 193 (67)           | 33 (87)          | 3.104 (1.212 - 7.952) | 0.018   |
| HE at inclusion      | 15 (5)             | 6 (16)           | 3.306 (1.381 - 7.911) | 0.007   |
| Previous infection   | 54 (19)            | 13 (34)          | 2.143 (1.096 - 4.190) | 0.026   |
| Bilirubin (mg/dL)    | 1.9 (1.2 - 2.8)    | 2.7 (1.6 - 3.5)  | 1.242 (1.106 - 1.394) | <0.001  |

|                                                        |                    |                    |                       |        |
|--------------------------------------------------------|--------------------|--------------------|-----------------------|--------|
| <b>INR</b>                                             | 1.31 (1.18 - 1.46) | 1.36 (1.24 - 1.51) | 1.014 (0.732 - 1.405) | 0.932  |
| <b>Creatinine (mg/dL)</b>                              | 0.78 (0.67 - 1.00) | 0.82 (0.69 - 0.98) | 1.070 (1.036 - 1.104) | <0.001 |
| <b>Serum Na (mEq/L)</b>                                | 137 (135 - 139)    | 136 (134 - 138)    | 0.934 (0.871 - 1.002) | 0.056  |
| <b>Leukocyte count (10<sup>3</sup>/mm<sup>3</sup>)</b> | 5.2 (4.0 - 6.7)    | 4.9 (4.0 - 6.0)    | 0.928 (0.794 - 1.084) | 0.345  |
| <b>MELD Na score</b>                                   | 13 (9 - 16)        | 16 (10 - 20)       | 1.072 (1.021 - 1.125) | 0.005  |
| <b>sPD-L1 (pg/mL)</b>                                  | 99 (77 - 128)      | 121 (91 - 152)     | 1.048 (1.016 - 1.081) | 0.003  |

**Table S9 - Multivariate analysis for factors associated with 1-year mortality in patients from Cohort 2.** Stepwise forward Cox analysis including HE, ascites, MELD Na score, leucocyte count and sPD-L1, according to its statistical significance ( $p < 0.05$ ) in univariate analysis.

| <b>Variable</b>   | <b>p value</b> | <b>HR</b>          | <b>95%CI</b>               |
|-------------------|----------------|--------------------|----------------------------|
| sPD-L1 (pg/mL)    | 0.009          | 1.046 <sup>#</sup> | 1.011 - 1.082 <sup>#</sup> |
| MELD sodium score | 0.027          | 1.062              | 1.007 - 1.120              |
| HE at inclusion   | 0.004          | 3.665              | 1.523 - 8.824              |

<sup>#</sup> HR evaluated per 10 units

HE, hepatic encephalopathy; HR, hazard ratio; MELD, model for end-stage liver disease; sPD-L1, soluble programmed death-ligand 1.

**Table S10 - Univariate analysis for factors associated to mortality in patients from Cohort 3.** Hazard ratios (HR) and corresponding 95% confidence intervals (CI) were estimated using Cox proportional hazards models. P-values correspond to the Wald test for the significance of each covariate.

| <b>Variable</b>                                 | <b>Alive<br/>(N = 344)</b> | <b>Dead<br/>(N = 56)</b> | <b>HR (95%CI)</b> | <b>p value</b> |
|-------------------------------------------------|----------------------------|--------------------------|-------------------|----------------|
| <b>Age</b>                                      | 57 (50-64)                 | 60 (53-67)               | 1.03 (1.00-1.06)  | 0.036          |
| <b>Kleiner fibrosis stage<br/>F0-1/F2/F3/F4</b> | 223/71/16/34               | 15/17/4/20               | 1.72 (1.40-2.11)  | <0.001         |
| <b>LSM (kPa)</b>                                | 5.8 (4.6-10)               | 15.9 (6.1-31.4)          | 1.02 (1.01-1.04)  | <0.001         |
| <b>Years of excessive drinking</b>              | 16 (8-26)                  | 16 (8-26)                | 1.00 (0.98-1.03)  | 0.766          |
| <b>Years of smoking</b>                         | 25 (8-40)                  | 35 (25-40)               | 1.02 (1.00-1.04)  | 0.026          |
| <b>MELD score</b>                               | 6 (6-7)                    | 7 (6-9)                  | 1.28 (1.16-1.41)  | <0.001         |
| <b>Leukocytes (10<sup>9</sup>/L)</b>            | 6.6 (5.3-8.3)              | 7.1 (5.4-8.4)            | 0.99 (0.88-1.11)  | 0.858          |
| <b>C-reactive protein (mg/L)</b>                | 2.2 (1.0-4.8)              | 3.7 (2.3-6.7)            | 1.00 (0.99-1.02)  | 0.854          |
| <b>PD-L1 (NPX)</b>                              | 5.6 (5.3-5.9)              | 6.1 (5.7-6.5)            | 3.29 (2.19-4.95)  | <0.001         |

**Table S11 - Multivariate analysis for factors associated with mortality in patients from Cohort 3.**

| <b>Variable</b> | <b>p-value</b> | <b>HR</b> | <b>95%CI</b> |
|-----------------|----------------|-----------|--------------|
| LSM (kPa)       | 0.022          | 1.01      | 1.00 - 1.03  |
| sPD-L1          | 0.002          | 2.69      | 1.44 - 5.05  |

Stepwise forward Cox analysis, according to its statistical significance ( $p < 0.05$ ) in univariate analysis. The total cohort includes 400 patients with 56 events. In this regression, 387 patients are included in a complete case analysis due to missing values of transient elastography ( $n = 13$ ) and MELD ( $n = 1$ ). HR, hazard ratio; LSM, liver stiffness measurement; MELD, model for end-stage liver disease; sPD-L1, soluble programmed death-ligand 1; TE, transient elastography.

**Table S12.- STROBE Statement.** Checklist of items that should be included in reports of cohort studies.

|                              | Item No | Recommendation                                                                                                                                                                                                                                                                                                         | Page No                             |
|------------------------------|---------|------------------------------------------------------------------------------------------------------------------------------------------------------------------------------------------------------------------------------------------------------------------------------------------------------------------------|-------------------------------------|
| <b>Title and abstract</b>    | 1       | (a) Indicate the study's design with a commonly used term in the title or the abstract<br>(b) Provide in the abstract an informative and balanced summary of what was done and what was found                                                                                                                          | 1<br>9                              |
| <b>Introduction</b>          |         |                                                                                                                                                                                                                                                                                                                        |                                     |
| Background/rationale         | 2       | Explain the scientific background and rationale for the investigation being reported                                                                                                                                                                                                                                   | 10,11                               |
| Objectives                   | 3       | State specific objectives, including any prespecified hypotheses                                                                                                                                                                                                                                                       | 11                                  |
| <b>Methods</b>               |         |                                                                                                                                                                                                                                                                                                                        |                                     |
| Study design                 | 4       | Present key elements of study design early in the paper                                                                                                                                                                                                                                                                | 12                                  |
| Setting                      | 5       | Describe the setting, locations, and relevant dates, including periods of recruitment, exposure, follow-up, and data collection                                                                                                                                                                                        | 12,13                               |
| Participants                 | 6       | (a) Give the eligibility criteria, and the sources and methods of selection of participants. Describe methods of follow-up<br>(b) For matched studies, give matching criteria and number of exposed and unexposed                                                                                                      | 12,13,<br>S1                        |
| Variables                    | 7       | Clearly define all outcomes, exposures, predictors, potential confounders, and effect modifiers. Give diagnostic criteria, if applicable                                                                                                                                                                               | 13-15                               |
| Data sources/<br>measurement | 8*      | For each variable of interest, give sources of data and details of methods of assessment (measurement). Describe comparability of assessment methods if there is more than one group                                                                                                                                   | 13-17                               |
| Bias                         | 9       | Describe any efforts to address potential sources of bias                                                                                                                                                                                                                                                              | 16,17                               |
| Study size                   | 10      | Explain how the study size was arrived at                                                                                                                                                                                                                                                                              | NA                                  |
| Quantitative variables       | 11      | Explain how quantitative variables were handled in the analyses. If applicable, describe which groupings were chosen and why                                                                                                                                                                                           | 16                                  |
| Statistical methods          | 12      | (a) Describe all statistical methods, including those used to control for confounding<br>(b) Describe any methods used to examine subgroups and interactions<br>(c) Explain how missing data were addressed<br>(d) If applicable, explain how loss to follow-up was addressed<br>(e) Describe any sensitivity analyses | 16,17<br>16,17<br>NA<br>16<br>16,17 |
| <b>Results</b>               |         |                                                                                                                                                                                                                                                                                                                        |                                     |
| Participants                 | 13*     | (a) Report numbers of individuals at each stage of study—eg numbers potentially eligible, examined for eligibility, confirmed eligible, included in the study, completing follow-up, and analysed<br>(b) Give reasons for non-participation at each stage<br>(c) Consider use of a flow diagram                        | NA<br>NA<br>NA                      |
| Descriptive data             | 14*     | (a) Give characteristics of study participants (eg demographic, clinical, social) and information on exposures and potential confounders<br>(b) Indicate number of participants with missing data for each variable of interest<br>(c) Summarise follow-up time (eg, average and total amount)                         | 18,19,<br>T1<br>NA<br>12,13,19      |
| Outcome data                 | 15*     | Report numbers of outcome events or summary measures over time                                                                                                                                                                                                                                                         | 18-21                               |

|                          |    |                                                                                                                                                                                                                                                                                                                                                                                                               |                                                    |
|--------------------------|----|---------------------------------------------------------------------------------------------------------------------------------------------------------------------------------------------------------------------------------------------------------------------------------------------------------------------------------------------------------------------------------------------------------------|----------------------------------------------------|
| Main results             | 16 | (a) Give unadjusted estimates and, if applicable, confounder-adjusted estimates and their precision (eg, 95% confidence interval). Make clear which confounders were adjusted for and why they were included<br>(b) Report category boundaries when continuous variables were categorized<br>(c) If relevant, consider translating estimates of relative risk into absolute risk for a meaningful time period | 18-21,<br>T2,T3,T4,<br>F1,F2,F3,F4<br>18<br><br>NA |
| Other analyses           | 17 | Report other analyses done—eg analyses of subgroups and interactions, and sensitivity analyses                                                                                                                                                                                                                                                                                                                | NA                                                 |
| <b>Discussion</b>        |    |                                                                                                                                                                                                                                                                                                                                                                                                               |                                                    |
| Key results              | 18 | Summarise key results with reference to study objectives                                                                                                                                                                                                                                                                                                                                                      | 21                                                 |
| Limitations              | 19 | Discuss limitations of the study, taking into account sources of potential bias or imprecision. Discuss both direction and magnitude of any potential bias                                                                                                                                                                                                                                                    | 24                                                 |
| Interpretation           | 20 | Give a cautious overall interpretation of results considering objectives, limitations, multiplicity of analyses, results from similar studies, and other relevant evidence                                                                                                                                                                                                                                    | 21-25                                              |
| Generalisability         | 21 | Discuss the generalisability (external validity) of the study results                                                                                                                                                                                                                                                                                                                                         | 21-25                                              |
| <b>Other information</b> |    |                                                                                                                                                                                                                                                                                                                                                                                                               |                                                    |
| Funding                  | 22 | Give the source of funding and the role of the funders for the present study and, if applicable, for the original study on which the present article is based                                                                                                                                                                                                                                                 | 4                                                  |
