# Supplementary material
Source: Elsevier journal article supplement (https://cris.unibo.it/retrieve/2bcfb699-8a5e-48c9-807f-38ee4d6e9b24/mmc4.zip)
Supplement: mmc4 [file mmc4.pdf › mmc4.pdf]

# PD-L1 and the risk of bacterial infection in patients with chronic liver diseases: An international multicohort study

## Authors

Adrià Juanola, Gabriel Mezzano, Elisa Pose, ..., Salvatore Piano, Elsa Solà, Pere Ginès

## Correspondence

juanola@clinic.cat (A. Juanola), pgines@clinic.cat (P. Ginès).

## Graphical abstract

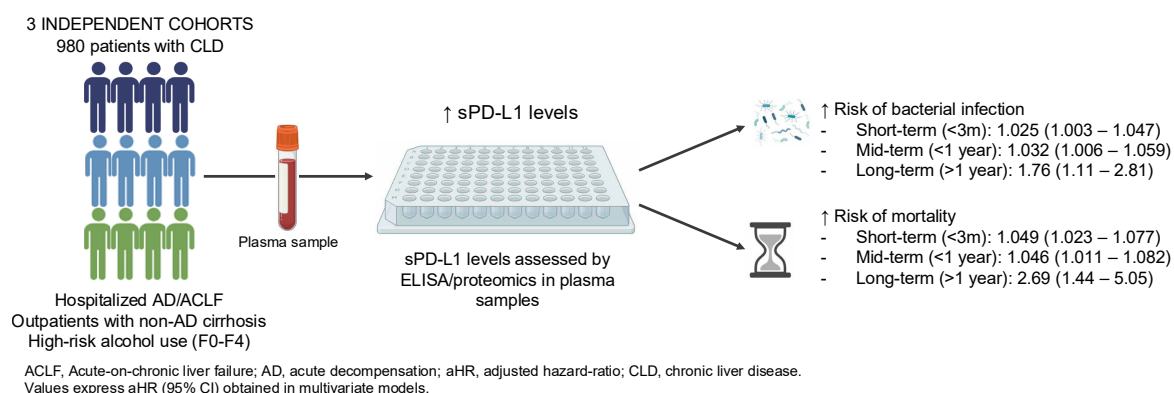

## Highlights:

- SPD-L1 plasma levels increase with liver disease progression, reaching the highest levels in patients with ACLF.
- SPD-L1 levels independently predict the development of bacterial infections and mortality among patients with chronic liver disease.
- SPD-L1 plasma levels identify an immune dysfunction phenotype in patients with chronic liver disease.
- SPD-L1 may help guide early preventive strategies in patients with chronic liver disease who are at high risk of developing bacterial infections.

## Impact and implications:

This study explores the role of soluble PD-L1 as a biomarker of immune dysfunction and its association with clinical outcomes in patients with chronic liver disease. Our findings demonstrate that soluble PD-L1 levels increase with the progression of liver disease and they are independently associated with an increased risk of bacterial infection development and mortality. These results could help physicians identify high-risk individuals earlier and implement preventive strategies.

# PD-L1 and the risk of bacterial infection in patients with chronic liver diseases: An international multicohort study

Adrià Juanola<sup>1,2,3,\*†</sup>, Gabriel Mezzano<sup>4,†</sup>, Elisa Pose<sup>1,2,3</sup>, Maria J. Moreta<sup>1,2,3</sup>, Simone Incicco<sup>5</sup>, Roberta Gagliardi<sup>5</sup>, Stine Johansen<sup>6,7</sup>, Nikolaj Torp<sup>6,7</sup>, Mads Israelsen<sup>6,7</sup>, Natalia Jiménez-Esquivel<sup>1</sup>, Joaquín Castillo-Iturra<sup>1</sup>, Jordi Ribera<sup>2,3,8</sup>, Jordi Gratacós-Ginès<sup>1,2,3</sup>, Anna Soria<sup>1,2,3</sup>, Andrés Cárdenas<sup>9,2,3</sup>, Martina Pérez-Guach<sup>1,2,3</sup>, Marta Cervera<sup>2,3</sup>, Ruth Nadal<sup>2,3</sup>, Queralto Herms<sup>1</sup>, Marta Tonon<sup>5</sup>, Torben Hansen<sup>10</sup>, Evelina Stankevic<sup>10</sup>, Yun Huang<sup>10</sup>, Victor Vargas<sup>3,11</sup>, Giacomo Zaccherini<sup>12,13</sup>, Carlo Alessandria<sup>14</sup>, Frank E. Uschner<sup>15</sup>, Ulrich Beuers<sup>16</sup>, Claire Francoz<sup>17,18</sup>, Rajeshwar P. Mookerjee<sup>19,20</sup>, Wim Laleman<sup>15,21</sup>, Cristina Solé<sup>3,22</sup>, Rafael Bañares<sup>3,23,24</sup>, Berta Cuyàs<sup>3,25</sup>, Xavi Ariza<sup>26</sup>, Mar Coll<sup>2,3</sup>, Isabel Graupera<sup>1,2,3</sup>, Núria Fabrellas<sup>2,3,27</sup>, Manuel Morales-Ruiz<sup>2,3,8</sup>, Maja Thiele<sup>6,7</sup>, Aleksander Krag<sup>6,7</sup>, Paolo Angeli<sup>5</sup>, Salvatore Piano<sup>5</sup>, Elsa Solà<sup>28</sup>, Pere Ginès<sup>1,2,3,29,\*</sup>

JHEP Reports 2025. vol. 7 | 1–8

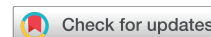

**Background & Aims:** Impaired phagocytic capacity due to activation of the PD-1/PD-L1 pathway has been implicated in the development of bacterial infections in patients with cirrhosis. Soluble PD-L1 (sPD-L1) is easily measurable in plasma and has been proposed as a biomarker of sepsis. In the current study, we aim to evaluate the role of sPD-L1 as a biomarker of bacterial infection development in patients with cirrhosis.

**Methods:** Plasma samples from 995 patients with chronic liver disease grouped in three cohorts were analyzed: an initial cohort of 268 hospitalized patients with acute decompensated cirrhosis, 327 out-patients with non-acute decompensated cirrhosis and finally 400 patients with high-risk alcohol consumption, including all stages of liver fibrosis, from mild/no fibrosis to cirrhosis (F0–F4). The main outcomes of the study were development of bacterial infection and mortality.

**Results:** Patients who developed bacterial infections had higher median levels of sPD-L1 than those who did not (160 [IQR 116–221] vs. 136 [IQR 97–193] pg/ml, respectively,  $p$  value <0.001; hazard ratio 1.034, 95% CI 1.014–1.055). Levels of sPD-L1 were associated with bacterial infection development after adjustment for confounding factors. During follow-up, patients who died had higher median sPD-L1 levels than survivors, after adjustment for MELD Na (180 [IQR 143–267] vs. 134 [IQR 97–187] pg/ml, respectively;  $p$  value <0.001; HR 1.066, 95% CI 1.043–1.089). These findings were observed in all cohorts.

**Conclusions:** Plasma levels of sPD-L1 are associated with the risk of bacterial infection development irrespective of the stage of chronic liver disease. Furthermore, higher sPD-L1 levels are linked to increased mortality. Measurement of sPD-L1 levels may help identify patients at high risk of developing bacterial infections and guide the implementation of new preventive strategies.

© 2025 The Authors. Published by Elsevier B.V. on behalf of European Association for the Study of the Liver (EASL). This is an open access article under the CC BY-NC-ND license (<http://creativecommons.org/licenses/by-nc-nd/4.0/>).

## Introduction

Patients with cirrhosis are at risk of developing complications, including ascites/edema, gastrointestinal bleeding, hepatic encephalopathy (HE), and bacterial infections.<sup>1</sup> Bacterial infections are frequent, have a high tendency to recur, and are associated with high mortality, ranging between 10% to 20% within 30 days.<sup>1–3</sup> Moreover, infections may act as the triggering factor of other complications of cirrhosis, particularly portal hypertensive-related bleeding, acute kidney injury, and acute-on-chronic liver failure (ACLF).<sup>1–3</sup>

The mechanisms responsible for the high prevalence of bacterial infections in cirrhosis are only partially understood.<sup>2,3</sup> Several lines of evidence indicate that infections in cirrhosis are related to alterations in the gut-liver axis. Profound disturbances in the composition of the intestinal and oral microbiome and increased gut permeability lead to increased

translocation of bacteria and bacterial products from the gut to the systemic circulation.<sup>2,4,5</sup> Moreover, cirrhosis is characterized by important alterations of immune function that affect not only the innate immune system but also the adaptive immune system. The alteration of the adaptive immune system is characterized by features of systemic inflammation, with increased plasma levels of inflammatory cytokines that parallel clinical disease progression, associated with progressive overexpression of immune-suppressive factors that lead to immune paralysis.<sup>6</sup> However, it is unknown whether immune paralysis phenomena also occur in early stages of the disease, in the same manner as systemic inflammation.<sup>7</sup> The immune alterations that occur in patients with cirrhosis alongside the progression of the disease are known as cirrhosis-associated immune dysfunction and are thought to be due to the unrelenting stimulation of the immune system by antigens of

\* Corresponding authors. Address: C/Villarroel 170. 08036, Barcelona, Catalonia, Spain; Tel.: +34932275400.

E-mail addresses: [juanola@clinic.cat](mailto:juanola@clinic.cat) (A. Juanola), [pgines@clinic.cat](mailto:pgines@clinic.cat) (P. Ginès).

† Shared co-authorship

<https://doi.org/10.1016/j.jhepr.2025.101597>

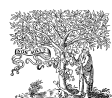

intestinal origin (pathogen-associated molecular patterns) and/or from the liver parenchyma (damage-associated molecular patterns).<sup>8,9</sup>

One of the most important immunosuppressive factors of the adaptive immune response is the programmed cell death protein 1 (PD-1).<sup>10</sup> PD-1 is expressed during T-cell activation and opposes positive signals through the T-cell receptor, and co-stimulatory signals such as CD28, by engaging its ligands, mainly PD-L1, but also PD-L2. This system functions as a break for the adaptive immune response. In advanced cirrhosis, there is an overexpression of the PD-1/PD-L1 pathway. Experimental and *in vitro* studies have shown that this system plays a role in the impaired phagocytic activity of both monocytes and liver macrophages and blockade of the PD-1/PD-L1 pathway improves phagocytic activity of both cell types.<sup>11,12</sup> We therefore hypothesize that overexpression of the PD-1/PD-L1 pathway could be an important pathogenic factor contributing to bacterial infections in patients with advanced cirrhosis. The aim of the present study was to evaluate the association between soluble PD-L1 (sPD-L1) levels, as a surrogate marker of the activity of PD-1/PD-L1 pathway, and the development of bacterial infections and mortality in patients with chronic liver disease.

## Patients and methods

### Study population

This study was conducted in 995 patients prospectively recruited in three independent cohorts representing the complete spectrum of chronic liver disease, including patients with cirrhosis (both decompensated and compensated), as well as patients with different degrees of fibrosis but without cirrhosis. The description of the three cohorts is summarized below.

#### Cohort 1

This cohort includes 268 patients with decompensated cirrhosis who were hospitalized for treatment of complications in the Liver Unit of the Hospital Clinic of Barcelona (Catalonia, Spain) between April 2015 and November 2019. Patients were prospectively enrolled at admission and followed up for 3 months, with collection of clinical data and survival status. Emphasis was placed on the collection of information about bacterial infections that occurred during follow-up.

#### Cohort 2

The second cohort was composed of 327 outpatients with decompensated cirrhosis, with ascites as the most common complication. This cohort included two subsets of patients recruited prospectively: 113 patients from the University of Padova (Padova, Italy) and 214 patients who participated in the LiverHope Efficacy Trial (NCT03150459), a randomized controlled trial evaluating the efficacy of the combination of simvastatin and rifaximin vs. placebo in the prevention of ACLF performed in seven European countries (France, Italy, Germany, United Kingdom, Holland, Belgium, and Spain). The results of this latter study showed no effect of treatment on the incidence of bacterial infections or other complications of cirrhosis.<sup>13</sup> All patients in this cohort were followed up for 1 year. Data on bacterial infections and survival were collected.

#### Cohort 3

The last cohort was composed of 400 individuals with high-risk alcohol consumption included in a prospective study assessing the presence of liver disease performed in the Region of Southern Denmark between April 2013 and September 2018.<sup>14</sup> This cohort included all stages of liver fibrosis, from mild/no fibrosis (F0–F1), moderate fibrosis (F2) to advanced fibrosis (F3) or cirrhosis (F4) (238, 88, 20 and 54 individuals, respectively). No patient had decompensated cirrhosis.

The inclusion and exclusion criteria for each cohort are detailed in [Table S1](#). All patients provided written informed consent and the study protocols were approved by the institutional review board of the Hospital Clinic of Barcelona and the other participating centers (HCB/2014/0577 & HCB2/2015/0653, HCB/2018/1141, NCT03780673, 392n/AO and S-20120071 and S-20160021).

### Main outcomes and study design

This is a prospective, observational, multicohort study. The primary objective of the study was to assess the association between plasma sPD-L1 and the development of bacterial infections during follow-up. The secondary objective was to investigate the association between plasma sPD-L1 and mortality rate during follow-up.

#### Follow-up timeline and duration

Due to the different nature of the cohorts (inpatients with decompensated cirrhosis, outpatients with decompensated cirrhosis and patients with alcohol risk consumption from mild/no fibrosis to cirrhosis) timeframes for outcome evaluation differed between them. Patients in Cohort 1 were followed-up during a 3-month period, while patients in Cohort 2 were followed-up during a 1-year period. In both cohorts, patients who underwent liver transplantation (LT) or were lost to follow-up were censored at the time of LT or last registry. In case of patients from Cohort 3, follow-up started at inclusion and ended on October 1st, 2020 (median follow-up time: 4.3 [IQR 2.8–6.3] years). Demographic and clinical data, together with standard liver and kidney tests were collected from all patients at enrollment. Plasma samples were collected at the time of enrollment to measure sPD-L1.

#### Bacterial infection criteria

The criteria used to define bacterial infection were very similar among the three cohorts. In Cohorts 1 and 2, bacterial infections were established based on at least one of the following criteria: a) positive cultures of blood or other organic fluids together with need for antibiotic treatment, or b) clinical suspicion of infection based on clinical and/or analytical data requiring empiric antibiotic therapy in the presence of negative cultures.<sup>15</sup> In Cohort 3, infections were collected from electronic healthcare files, and were defined on the basis of the presence of at least 3 of the following criteria: 1) biochemical signs of infection including elevated C-reactive protein, leukocytosis, and neutrophilia; 2) relevant clinical symptoms including fever and organ-specific symptoms; 3) radiological signs of infection; 4) prescription of antibiotic/antiviral/antifungal medication; and 5) positive cultures.<sup>14</sup>

Management of infections in the three cohorts was done according to international guidelines.<sup>15–18</sup>

### sPD-L1 measurement

The activity of the PD-1/PD-L1 pathway was assessed by measuring the plasma levels of sPD-L1, a form with biological activity, which is generated through the shedding of the membrane-bound form or as alternate splice variants.<sup>19</sup>

Plasma samples for sPD-L1 measurement were centrifuged at 2,000 rpm for 10 min and the supernatant stored at -80 °C until analysis. In Cohort 1 and 2, plasma sPD-L1 levels were measured using the human/cynomolgus monkey PD-L1/B7-H1 quantikine ELISA kit (R&D systems, Minneapolis, MN, USA) following the manufacturer's protocol. The intra-assay and inter-assay coefficients of variation were lower than 2% and 8%, respectively, with mean values of sPD-L1 ranging from 244 to 878 pg/ml.

In Cohort 3, plasma sPD-L1 levels were measured by Olink Proteomics using the Target-96 Inflammation panel (Uppsala, Sweden). The proteomics panel was evaluated in serum using Proximity Extension Assay technology. sPD-L1 is expressed with arbitrary units (normalized protein expression [NPX]) on the log<sub>2</sub> scale.

Methodological differences in sPD-L1 measurement mean that levels are not directly comparable across cohorts; therefore, the cohorts could not be merged.

### Statistical analysis

Categorical variables are reported as absolute frequencies and percentages. Quantitative variables are reported as median and IQR. Comparisons between variables were performed using the Cox proportional hazard model either for categorical variables or for continuous variables. Survival function was described using the Kaplan-Meier method and log-rank test. Hazard ratios for sPD-L1 levels when measured by ELISA were calculated based on a 10-unit increase in picograms per milliliter; in case of OLINK determination, HRs were calculated based on a 1-unit increase. Since the aim of the study was to analyze the relationship between plasma levels of sPD-L1 and the development of bacterial infections and mortality in patients with cirrhosis we performed a series of bivariate Cox regression models including the biomarker and one potential confounder at a time. This statistical approach, known as a “change-in-estimate analysis”, allowed us to assess whether the estimated HR for sPD-L1 remains stable after accounting for single covariates. Unlike multivariable modeling, this method is not intended for prediction, but rather to evaluate the consistency of the association in the presence of potential confounding factors.<sup>20,21</sup> Candidate confounding factors were selected based on clinical rationale and the results of univariate analyses for bacterial infection development or mortality. Transplanted patients or patients lost during follow-up were censored at the time of intervention or last follow-up.

Additionally, a second statistical approach was also conducted and factors present in the univariate analysis were selected for the multivariate analysis. The final model was fitted using a stepwise forward method based on the improvement in model likelihood ratios. Significance levels to enter and drop model variables were adopted as 5% and 10%, respectively.

All statistical analyses were conducted using Stata 16.1 software, StataCorp® and R v4.4.1, R Studio®. This article adheres to the “Strengthening the Reporting of Observational Studies in Epidemiology (STROBE) Statement: guidelines for reporting observational studies”<sup>22</sup> (Table S12).

## Results

### Baseline characteristics of the study population

A total of 995 patients were included across three cohorts. Baseline characteristics of each cohort are summarized in Table 1. The majority of patients were male (75%), and alcohol-related liver disease was the most common etiology. Liver function, as assessed by the model for end-stage liver disease (MELD) score, was most severely impaired in Cohort 1, which comprised hospitalized patients with acute decompensation and/or ACLF. As expected, patients from Cohort 2 had less severe cirrhosis compared to patients from Cohort 1 (median MELD Na score 13 [IQR 9–17] vs. 19,<sup>13–26</sup> respectively;  $p < 0.001$ ), while those in Cohort 3 exhibited normal or only mildly altered liver function (median MELD score 6 [IQR 6–8]).

Regarding sPD-L1 levels, a stepwise increase was observed across clinical stages in patients from Cohort 1 and 2, with median values rising from non-acute decompensation to acute decompensation and peaking in patients with ACLF (non-AD: 101 [IQR 77–132] pg/ml; AD: 130 [IQR 96–182] pg/ml; ACLF: 172 [IQR 131–219] pg/ml;  $p < 0.001$ ) (Fig. S1). Regarding patients from Cohort 3, patients categorized as F3–F4 displayed higher sPD-L1 levels measured by proteomics than F0–F2 individuals (median 6.2 [5.8–6.5] vs. 5.6 [5.3–5.9] NPX,  $p < 0.001$ ).

### Bacterial infections and sPD-L1 levels

Over the 3-month follow-up period, 101 patients (38%) from Cohort 1 developed at least one episode of bacterial infection (median time 14 [6–33] days). The most common type of bacterial infection was urinary tract infection (UTI), followed by respiratory tract infection, spontaneous bacteremia, and spontaneous bacterial peritonitis (SBP) (36%, 21%, 11%, and 9%, respectively) (Table S2). Table S3 reports univariate analysis for factors associated with bacterial infection development. Patients who developed bacterial infections during follow-up had higher baseline plasma levels of sPD-L1 compared to patients who did not develop bacterial infections (median 160 [IQR 116–221] vs. 136 [IQR 97–193] pg/ml, respectively,  $p < 0.001$ ; HR 1.034, 95% CI 1.014–1.055). Fig. 1 shows the probability of developing bacterial infections in patients categorized into two groups according to the median value of sPD-L1 (HR 1.696, 95% CI 1.139–2.525,  $p = 0.009$ ).

sPD-L1 remained associated with the development of bacterial infection after adjustment for potential confounders (Fig. 2). In a multivariate analysis, sPD-L1, together with MELD Na score, history of previous bacterial infection, leukocyte count and presence of HE, were independently associated with the development of bacterial infection (Table 2).

In Cohort 2, 82 of the 327 patients (25%) developed at least one episode of bacterial infection during follow-up (median time 149 [29–249] days). The most common infection subtypes were UTI, followed by SBP (27% and 22%, respectively; Table S2). Factors associated with bacterial infection development in Cohort 2 are reported in Table S4. As with Cohort 1,



**Table 1. Baseline demographic and clinical characteristics of patients included in the three cohorts.**

| Variable                                      | Cohort 1<br>(n = 268)      | Cohort 2<br>(n = 312)     | Cohort 3<br>(n = 400)    |
|-----------------------------------------------|----------------------------|---------------------------|--------------------------|
| Age (years)                                   | 60 (53 - 67)               | 58 (52 - 66)              | 58 (51 - 64)             |
| Sex (female)                                  | 73 (27)                    | 85 (26)                   | 92 (23)                  |
| Etiology liver disease                        |                            |                           |                          |
| Alcohol-related                               | 165 (62)                   | 232 (71)                  | 400 (100)                |
| HCV                                           | 38 (14)                    | 23 (7)                    | -                        |
| Alcohol + viral                               | 21 (8)                     | 8 (3)                     | -                        |
| MASLD                                         | 22 (8.5)                   | 26 (8)                    | -                        |
| Other                                         | 22 (8.5)                   | 37 (11)                   | -                        |
| Type 2 DM                                     | 85 (32)                    | -                         | 41 (10)                  |
| Ascites at inclusion                          | 179 (67)                   | 226 (69)                  | -                        |
| HE at inclusion                               | 94 (35)                    | 21 (6)                    | -                        |
| Treatment with norfloxacin                    | 48 (18)                    | 22 (7)                    | -                        |
| Treatment with rifaximin                      | 48 (18)                    | 40 (12)                   | -                        |
| Previous infection                            | 90 (34)                    | 67 (20)                   | -                        |
| Previous SBP                                  | 41 (15)                    | 18 (5.5)                  | -                        |
| Previous non SBP infection                    | 72 (27)                    | 59 (18)                   | -                        |
| Infection at inclusion                        | 145 (54)                   | -                         | -                        |
| AKI at inclusion                              | 104 (39)                   | -                         | -                        |
| ACLF at inclusion                             | 81 (30)                    | -                         | -                        |
| Grade 1                                       | 40 (15)                    | -                         | -                        |
| Grade 2                                       | 22 (8)                     | -                         | -                        |
| Grade 3                                       | 19 (7)                     | -                         | -                        |
| Serum bilirubin (mg/dl)                       | 2.6 (1.3–6.6)              | 2.0 (1.3–2.9)             | 0.6 (0.4–0.8)            |
| Serum albumin (g/L)                           | 29 (25–33)                 | -                         | 43 (40–45)               |
| INR                                           | 1.5 (1.3–1.9)              | 1.32 (1.19–1.47)          | 1.0 (0.9–1.1)            |
| Serum creatinine (mg/dl)                      | 1.0 (0.7–1.6)              | 0.8 (0.7–1.0)             | 0.8 (0.7–0.9)            |
| Serum sodium (mEq/L)                          | 136 (133–139)              | 137 (135–139)             | 140 (138–141)            |
| MELD sodium score                             | 19 (13–26)                 | 13 (9–17)                 | 6 (6–8)                  |
| Leukocyte count ( $\times 10^9/\text{mm}^3$ ) | 5.4 (3.8–8.4)              | 5.1 (4.0–6.7)             | 6.6 (5.3–8.3)            |
| CRP (mg/dl)                                   | 2.3 (0.9–5.0)              | -                         | 2.5 (1–5)                |
| sPD-L1 (pg/ml or NPX)                         | 148 (104–205) <sup>†</sup> | 100 (77–133) <sup>†</sup> | 5.7 (5.3–6) <sup>*</sup> |

Values are presented as median (IQR) for continuous variables and number (percentage) for categorical variables.

ACLF, acute-on-chronic liver failure; AKI, acute kidney injury; CRP, C-reactive protein; HE, hepatic encephalopathy; INR, international normalized ratio; MASLD, Metabolic associated steatotic liver disease; MELD, model for end-stage liver disease; SBP, spontaneous bacterial peritonitis; sPD-L1, soluble programmed death-ligand 1.

<sup>†</sup>Values expressed in pg/ml;

<sup>\*</sup>values expressed in NPX.

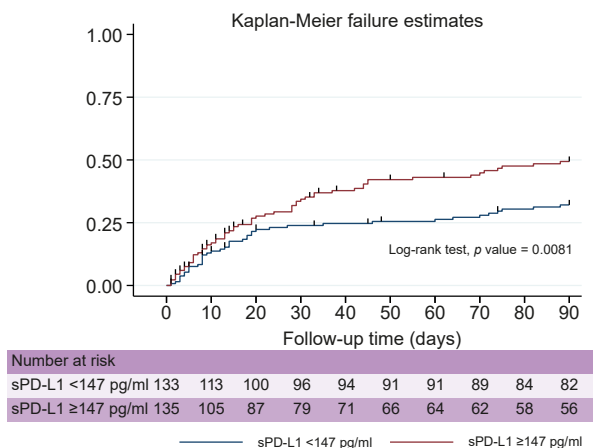

**Fig. 1. Cumulative incidence curves of bacterial infections in patients from Cohort 1 categorized according to sPD-L1 median levels.** Cumulative incidence estimates for 3-month bacterial infection development in patients from Cohort 1 stratified by sPD-L1 plasma levels using the cohort-specific median cut-off of 147 pg/ml. The blue curve represents patients with sPD-L1 <147 pg/ml, and the red curve represents those with sPD-L1 ≥147 pg/ml. The log-rank test was used to compare survival distributions between groups, with a statistically significant difference observed ( $p = 0.0081$ ). Censoring is indicated by tick marks, and the number at risk is displayed below the time axis. sPD-L1, soluble programmed death-ligand 1.

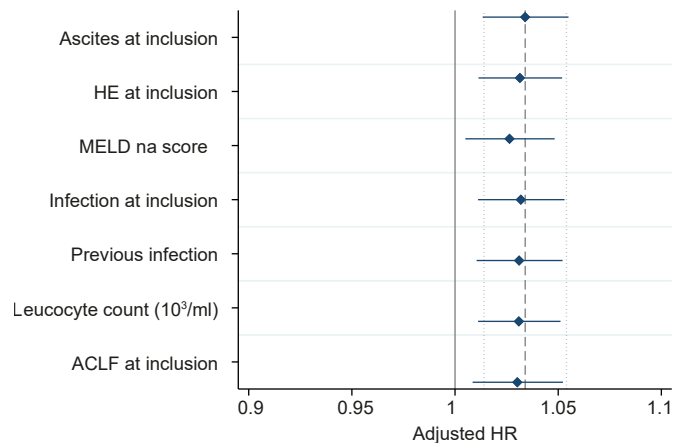

**Fig. 2. Adjusted HRs for sPD-L1 and potential confounders associated with 3-month bacterial infection in patients from Cohort 1.** Each diamond represents the adjusted HR of sPD-L1 when accounting for the indicated variable, based on a Cox proportional hazards model. The blue horizontal lines indicate the 95% CIs for each adjusted HR. The grey dashed vertical line marks the unadjusted HR of sPD-L1, and the grey dotted lines represent its corresponding 95% CI. Variables included in this analysis were selected based on significance in the univariate analysis. HR, hazard ratio; sPD-L1, soluble programmed death-ligand 1.

**Table 2. Multivariate analysis for the prediction of bacterial infection in Cohort 1.**

| Variable                                      | p value | HR                 | 95% CI                   |
|-----------------------------------------------|---------|--------------------|--------------------------|
| sPD-L1 (pg/ml)                                | 0.037   | 1.025 <sup>#</sup> | 1.003–1.047 <sup>#</sup> |
| MELD sodium score                             | <0.001  | 1.071              | 1.045–1.096              |
| Previous infection                            | <0.001  | 2.101              | 1.396–3.163              |
| HE at inclusion                               | 0.046   | 1.515              | 1.008–2.276              |
| Leukocyte count ( $\times 10^3/\text{mm}^3$ ) | 0.049   | 1.038              | 1.0002–1.077             |

Stepwise forward Cox analysis including factors with positive association ( $p$  value <0.05) in the univariate analysis.

HE, hepatic encephalopathy; HR, hazard ratio; MELD, model for end-stage liver disease; sPD-L1, soluble programmed death-ligand 1.

<sup>#</sup>HR evaluated per 10 units.

patients from Cohort 2 who developed bacterial infection had higher baseline plasma levels of sPD-L1 compared to patients who did not develop infection during follow-up (median 113 [IQR 87–150] vs. 99 [IQR 76–129] pg/ml, respectively;  $p = 0.015$ ). After adjustment for potential confounders, sPD-L1 remained significantly associated with bacterial infections (Fig. 3). Multivariate analysis confirmed that sPD-L1 levels, together with MELD Na, past history of infection and presence of HE and ascites at inclusion were independently associated with bacterial infection development (Table 3). Fig. S2 shows the cumulative incidence curves of bacterial infections in patients from Cohort 2 categorized according to sPD-L1 level (147 pg/ml).

Finally, 108 of the 400 patients from Cohort 3 (27%) developed at least one episode of bacterial infection during follow-up (median time: 2.3 [1.2–4.2] years). The most common infections were respiratory tract infections followed by UTI and skin and soft tissue infections (38%, 15% and 12% respectively). Only two patients (2%) developed SBP (Table S2). In line with Cohorts 1 and 2, plasma levels of sPD-L1 were associated with bacterial infection development during the follow-up period (HR 2.30, 95% CI 1.67–3.16,  $p < 0.001$ ). The univariate analysis for factors associated with the development

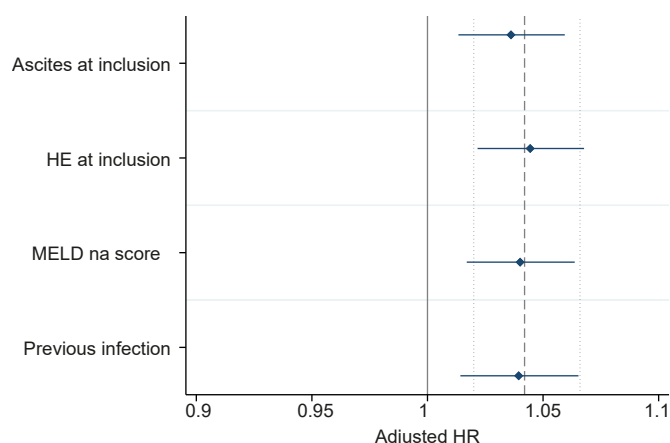

**Fig. 3. Adjusted HRs for sPD-L1 and potential confounders associated with 3-month bacterial infection in patients from Cohort 2.** Each diamond represents the adjusted HR of sPD-L1 when accounting for the indicated variable, based on a Cox proportional hazards model. The blue horizontal lines indicate the 95% CIs for each adjusted HR. The grey dashed vertical line marks the unadjusted HR of sPD-L1, and the grey dotted lines represent its corresponding 95% CI. Variables included in this analysis were selected based on significance in the univariate analysis. HR, hazard ratio; sPD-L1, soluble programmed death-ligand 1.

**Table 3. Multivariate analysis for the prediction of bacterial infection in Cohort 2.**

| Variable             | p value | HR    | 95% CI      |
|----------------------|---------|-------|-------------|
| sPD-L1 (pg/ml)       | 0.015   | 1.032 | 1.006–1.059 |
| MELD sodium score    | 0.009   | 1.050 | 1.012–1.089 |
| HE at inclusion      | 0.003   | 2.785 | 1.421–5.458 |
| Previous infection   | <0.001  | 2.554 | 1.611–4.050 |
| Ascites at inclusion | 0.009   | 2.399 | 1.245–4.622 |

Stepwise forward Cox analysis including factors with positive association ( $p$  value <0.05) in the univariate analysis.

\*HR evaluated per 10 units.

HE, hepatic encephalopathy; R, hazard ratio; MELD, model for end-stage liver disease; sPD-L1, soluble programmed death-ligand 1.

of bacterial infection in Cohort 3 is shown in Table S5. Moreover, after adjustment for potential confounders, sPD-L1 remained significantly associated with the development of bacterial infections (Fig. S3). In multivariate analysis, only sPD-L1 and the severity of liver fibrosis, as estimated by liver stiffness measurement assessed by vibration-controlled transient elastography, were associated with the development of bacterial infection (Table 4). Fig. S4 shows the cumulative incidence of bacterial infection in individuals from Cohort 3

**Table 4. Multivariate analysis for bacterial infection development in patients from Cohort 3.**

| Variable     | p value | HR    | 95% CI    |
|--------------|---------|-------|-----------|
| sPD-L1 (NPX) | 0.017   | 1.176 | 1.11–2.81 |
| LSM (kPa)    | 0.003   | 1.02  | 1.01–1.03 |
| MELD         | 0.049   | 1.11  | 1.00–1.23 |

Stepwise forward Cox analysis, according to its statistical significance ( $p$  <0.05) in univariate analysis. The total cohort includes 400 patients with 108 events. In this regression, 386 patients are included in a complete case analysis due to missing values of transient elastography ( $n$  = 13) and MELD ( $n$  = 1).

HR, hazard ratio; LSM, liver stiffness measurement; MELD, model for end-stage liver disease; NPX, normalized protein expression; sPD-L1, soluble programmed death-ligand 1.

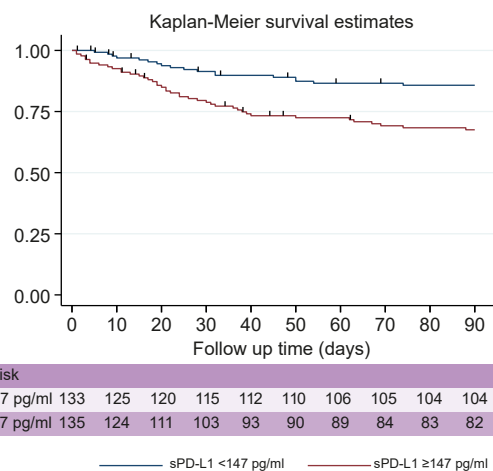

**Fig. 4. Kaplan-Meier survival curves in patients from Cohort 1 categorized by median sPD-L1 plasma levels.** Kaplan-Meier survival estimates for 3-month mortality in patients from Cohort 1 stratified by sPD-L1 plasma levels using the cohort-specific median cut-off of 147 pg/ml. The blue curve represents patients with sPD-L1 <147 pg/ml, and the red curve represents those with sPD-L1 ≥147 pg/ml. The log-rank test was used to compare survival distributions between groups, with a statistically significant difference observed ( $p$  = 0.0005). Censoring is indicated by tick marks, and the number at risk is displayed below the time axis. sPD-L1, soluble programmed death-ligand 1.

stratified by median sPD-L1 value in this cohort (5.7 normalized protein expression).

#### Association between sPD-L1 levels and mortality

During the 90-day follow-up, 60 of the 268 patients from Cohort 1 died (22.4%), 11 (4.1%) underwent LT, 186 (69.4%) remained alive, and 11 (4.1%) were lost to follow-up. Patients who died or were transplanted had higher plasma sPD-L1 levels compared to patients who remained alive (median 180 [IQR 143–267] vs. 134 [97–187] pg/ml, respectively;  $p$  <0.001; HR 1.066, 95% CI 1.043–1.089). Table S6 shows the factors associated with 90-day mortality in patients from Cohort 1. The 90-day survival curves of patients categorized into two groups according to the median value of sPD-L1 are shown in Fig. 4 (HR 2.567, 95% CI 1.478–4.461,  $p$  = 0.001).

To further investigate the relationship between sPD-L1 and 90-day mortality, serum sPD-L1 levels were tested with each variable potentially related to mortality. Results showed consistent statistical significance of sPD-L1 with minimal changes in the HR value (Fig. S5). Moreover, a multivariate analysis showed that MELD Na, leucocyte count, presence of HE, and sPD-L1 levels were independently associated with 90-day mortality (Table S7).

With respect to Cohort 2, 37 of the 327 patients (11%) died, 13 (4%) underwent LT, 9 (3%) were lost to follow-up, and 268 (82%) remained alive at the end of the 1-year follow-up period. Patients who died during follow-up had plasma levels of sPD-L1 higher than those of patients who survived (median 124 [IQR 91–152] vs. 99 [76–128] pg/ml, respectively;  $p$  = 0.002). Table S8 presents the results of univariate analysis for 1-year mortality. After adjustment for potential confounders, sPD-L1 levels remained significantly associated with mortality with stable HR (Figs. S6 and S7). Moreover, multivariate analysis confirmed findings from Cohort 1, showing that sPD-L1, MELD

Na score, and presence of HE were independently associated with 1-year mortality (Table S9).

Concerning Cohort 3, 56 of the 400 (14%) patients died, 8 (2%) were lost to follow-up, and the remaining 336 (84%) were alive at the end of the follow-up period. No patient was transplanted in this cohort. Plasma levels of sPD-L1 were increased in patients who died compared to patients who survived (see Table S10 for univariate analysis for factors associated with mortality in patients from Cohort 3). Notably, after adjustment for potential confounders, sPD-L1 remained independently associated with mortality, together with liver fibrosis stage assessed by liver stiffness measurement (Figs. S8 and S9; Table S11).

## Discussion

The findings of the current study demonstrate that in chronic liver diseases plasma levels of sPD-L1 are associated with the risk of bacterial infections. This association was consistent in all cohorts studied encompassing all stages of the natural history of chronic liver disease, from patients with fibrosis without cirrhosis to patients with compensated and decompensated cirrhosis, strengthening the relevance of the association. Interestingly, the association between sPD-L1 and bacterial infections was independent from factors known to be important in the susceptibility of these patients to infection, such as the severity of liver disease, as evaluated by liver function tests as well as prognostic scores, and inflammatory parameters, such as leukocyte count or C-reactive protein levels. Finally, the plasma levels of sPD-L1 were an independent predictive factor of mortality. Taken together, these findings suggest that the PD-1/PD-L1 pathway plays a role in the pathogenesis of bacterial infections in chronic liver diseases in general and, particularly, in cirrhosis.

PD-1 and PD-L1 are expressed by different immune cell types, including T lymphocytes, dendritic cells, B lymphocytes, monocytes, and macrophages, and their expression is induced in a transient manner by inflammatory cytokines.<sup>10</sup> In normal conditions, signals through the PD-1/PD-L1 pathway contribute to regulation of T-cell activation, fine-tuning of T-cell fate and functions, and T-cell tolerance, thus helping maintain an adequate balance in the immune system. When the activating factor is not cleared, such as during chronic infections or cancer, the PD-1/PD-L1 pathway remains persistently activated leading to constant inhibitory signals.<sup>23,24</sup> The soluble form of PD-L1 (sPD-L1) exerts similar functions to the membrane-bound PD-L1 and is a prognostic factor in patients with sepsis without cirrhosis.<sup>25</sup> Our group previously reported the presence of overexpression of PD-L1 in peripheral mononuclear cells from patients with cirrhosis that paralleled disease progression.<sup>11</sup> Moreover, overexpression of the system was also found in liver macrophages of experimental animals with chronic liver disease.<sup>11</sup> Notably, blockade of PD-L1 with a PD-L1 antibody restored the markedly impaired liver macrophage activity in an *in vivo* model of chronic liver diseases in mice.<sup>11</sup> Furthermore, overexpression of the PD-1/PD-L1 pathway has also been demonstrated in monocytes of patients with alcohol-related hepatitis and *in vitro* blockade of the system is associated with improved monocyte function.<sup>12</sup> The findings of the current study extend these previous experimental observations to clinical grounds by demonstrating the

existence of a strong association between plasma sPD-L1 levels and the risk of infection in a large multicohort study encompassing the broad spectrum of patients with chronic liver disease. Importantly, the current findings not only account for patients with decompensated cirrhosis, but also for patients with advanced fibrosis and compensated cirrhosis, showing that immune paralysis phenomena also occur in early stages of the disease, in the same manner that systemic inflammation is not only restricted to advanced stages but also occurs in early stages of chronic liver disease.<sup>6</sup>

The risk of infection is not homogeneous across the spectrum of chronic liver disease.<sup>3</sup> The risk is very high in patients with decompensated cirrhosis, particularly in hospitalized patients, while patients with stable decompensated cirrhosis have comparably lower risk. Patients with compensated cirrhosis are also at risk of infections even though these patients have relatively good liver function and absence of complications; importantly, infections may trigger decompensation in these patients.<sup>14</sup> Moreover, even patients with fibrosis without cirrhosis have significant risk of infection.<sup>14</sup> In addition to a diverse risk of infection, the type of infection is also different across disease stages. Our study was designed as a multicohort study to be able to capture the heterogeneity of chronic liver disease stages and the different prevalence and type of bacterial infections. Interestingly, sPD-L1 was consistently associated with the risk of infection in the three cohorts, with different prevalences and types of infection. These findings unveil an important role of the PD-1/PD-L1 pathway in the pathogenesis of infections and suggest that the overexpression of the PD-1/PD-L1 pathway is already present in early stages of chronic liver diseases and increases in parallel with disease progression, which may explain, at least in part, the progressively increased risk of infections throughout the course of chronic liver disease. The current findings, in conjunction with previously reported data,<sup>11,12,26</sup> may represent a potential target for specific therapies to help prevent infections in patients with cirrhosis.

Despite the strengths of the current study, there are some limitations that should be acknowledged. First, the levels of sPD-L1 were measured at a single time-point; thus, we have no information as to the evolution of plasma sPD-L1 levels over time and how they may change in individual patients as the disease progresses. Despite this limitation, the consistent association between baseline sPD-L1 levels and clinical outcomes across three independent cohorts supports its potential as a prognostic biomarker. We believe that the predictive capacity of sPD-L1 observed in this study is comparable to that of other well-established predictors of mortality in patients with cirrhosis, such as mild to moderate elevations in serum bilirubin and reduced albumin levels – both of which have been associated with long-term mortality, even several years after the initial assessment.<sup>27,28</sup> As for the cause-effect relationship between PD-L1 levels and bacterial infections, definitive proof would require performing a randomized controlled trial evaluating the effects of a blockade/antagonism of PD-L1 on the risk of bacterial infections in patients with cirrhosis. Second, most patients in this study had alcohol-related liver disease; therefore, there is limited information on expression of the PD-1/PD-L1 pathway in other etiologies of liver disease and its association with bacterial infections.<sup>12</sup> However, increased PD-L1 expression has been demonstrated in peripheral

monocytes of patients with HBV-decompensated cirrhosis and is associated with sepsis and ACLF risk, which suggests that overexpression of the pathway is independent of the etiology of cirrhosis.<sup>26</sup> Finally, in Cohort 3, plasma sPD-L1 levels were measured using proteomic analysis instead of ELISA. Consequently, these levels cannot be directly compared to those of the other two cohorts, which limits the ability to establish a threshold associated with increased risk of infections across disease stages. Nonetheless, the consistency of results with two different methods of measurement of sPD-L1 underscores the robustness of the findings.

## Affiliations

<sup>1</sup>Liver Unit, Hospital Clínic de Barcelona, Barcelona, Catalunya, Spain; <sup>2</sup>Institut d'Investigacions Biomèdiques August Pi i Sunyer (IDIBAPS), Barcelona, Catalunya, Spain; <sup>3</sup>Centro de Investigación Biomédica en Red Enfermedades Hepáticas y Digestivas (CIBEREHD), Madrid, Spain; <sup>4</sup>Centro de Enfermedades Digestivas, Universidad de los Andes, Chile; <sup>5</sup>Unit of Internal Medicine and Hepatology, Department of Medicine - Dimed, University and Hospital of Padova, Padova, Italy; <sup>6</sup>Centre for Liver Research, Department of Gastroenterology and Hepatology, Odense University Hospital, Denmark; <sup>7</sup>Institute of Clinical Research, University of Southern Denmark, Denmark; <sup>8</sup>Biochemistry and Molecular Genetics Department, Hospital Clínic de Barcelona, Spain; <sup>9</sup>GI & Liver Transplant Unit, Institut de Malalties Digestives i Metabòliques, Hospital Clínic, Barcelona, Spain; <sup>10</sup>Novo Nordisk Foundation Center for Basic Metabolic Research, University of Copenhagen, Copenhagen, Denmark; <sup>11</sup>Liver Unit, Hospital Universitari Vall d'Hebron, Barcelona, Spain; <sup>12</sup>Department of Medical and Surgical Sciences, University of Bologna, Bologna, Italy; <sup>13</sup>Unit of Semeiotics, Liver and Alcohol-Related Diseases, IRCCS Azienda Ospedaliero-Universitaria di Bologna, Bologna, Italy; <sup>14</sup>Division of Gastroenterology and Hepatology, A. O. U. Città della Salute e della Scienza di Torino, University of Turin, Turin, Italy; <sup>15</sup>Department of Internal Medicine B, University Hospital Münster, Münster, Germany; <sup>16</sup>Department of Gastroenterology and Hepatology, Amsterdam UMC, University of Amsterdam, Amsterdam Gastroenterology Endocrinology Metabolism, Amsterdam, the Netherlands; <sup>17</sup>Service d'Hépatologie, AP-HP, Hôpital Beaujon, DMU DIGEST, Centre de Référence des Maladies Vasculaires du Foie, Clichy, France; <sup>18</sup>Centre de Recherche sur l'Inflammation, Inserm, UMR, Paris, France; <sup>19</sup>Institute for Liver and Digestive Health, University College London, London, United Kingdom; <sup>20</sup>Department of Hepatology and Gastroenterology, Aarhus University, Aarhus, Denmark; <sup>21</sup>Department of Gastroenterology and Hepatology, Cluster of Liver and Biliopancreatic Disorders and Liver Transplantation, University Hospitals Leuven, KU Leuven, Leuven, Belgium; <sup>22</sup>Department of Gastroenterology and Hepatology, Parc Taulí Hospital Universitari, Institut d'Investigació i Innovació Parc Taulí (I3PT-CERCA), Universitat Autònoma de Barcelona, Sabadell, Spain; <sup>23</sup>Digestive Department, Hospital General Universitario Gregorio Marañón, Madrid, Spain; <sup>24</sup>Instituto de Investigación Sanitaria Gregorio Marañón (IISGM), Facultad de Medicina, Universidad Complutense de Madrid, Madrid, Spain; <sup>25</sup>Department of Gastroenterology, Hospital de la Santa Creu i Sant Pau, Universitat Autònoma de Barcelona, Barcelona, Spain; <sup>26</sup>Digestive Diseases Unit, Hospital Moisès Broggi, Sant Joan Despí, Barcelona, Spain; <sup>27</sup>Faculty of Nursing, University of Barcelona, Barcelona, Spain; <sup>28</sup>Institute for Immunity, Transplantation and Infection, Stanford University School of Medicine, Stanford, California, USA; <sup>29</sup>Faculty of Medicine and Health Sciences, University of Barcelona, Barcelona, Spain

## Abbreviations

ACLF, acute-on-chronic liver failure; HE, hepatic encephalopathy; HR, hazard ratio; MELD, model for end-stage liver disease; PD-1, programmed cell death receptor 1; PD-L1, programmed death ligand 1; SBP, spontaneous bacterial peritonitis; sPD-L1, soluble programmed death ligand 1; UTI, urinary tract infection.

## Financial support

This work was supported by a grant awarded to PG (PI23/00798), integrated in the Plan Nacional I+D+I, and co-funded by ISCIII-Subdirección General de Evaluación and European Regional Development Fund. AJ has been supported by a grant funded by Instituto de Salud Carlos III (PI24/01100). EP has been supported by a grant funded by Instituto de Salud Carlos III (PI22/00910). MJM has been funded by Contracte de Recerca "Clínic - La Pedrera", granted by Hospital Clínic de Barcelona. SP has been supported by a grant from the Italian Ministry of Health (GR-2021-12374075). AS is co-financed by a Rio Hortega grant and the European Union (expediente CM23/00133), Instituto de Salud Carlos III, Acción Estratégica en Salud, December 2023 Call. IG has been supported by a grant funded by Instituto de Salud Carlos III (PI22/00776). AC is funded by the Instituto de Salud Carlos III (ICSIII) through the project PI19/00752 and co-funded by the European Union. MT is funded by a grant from the Novo Nordisk Foundation (NNF20OC0059393). TH is funded by Novo Nordisk Foundation (grant no. NNF15OC0016544), the Novo Nordisk Foundation Challenge Program (grant no. NNF15OC0016692) and to the MicroLiver consortium.

## Conflict of interest

IG reports received consulting fees and speaking fees from Boehringer-Ingelheim and a research grant from Pfizer. AC is a consultant for Mallinckrodt Pharmaceuticals, Boston Scientific Corp, B. Braun and has participated on Advisory Boards for Mallinckrodt Pharmaceuticals and has received grant support from Mallinckrodt and Boston Scientific Corp. TH owns stocks in Novo Nordisk and Genmab, and has received research support from Novo Nordisk. The remaining authors have no conflicts to report. SP served as consultant for Plasma Protein Therapeutics Association, Boehringer Ingelheim and Resolution

In conclusion, the current study indicates the existence of an association between plasma sPD-L1 levels and risk of bacterial infections and mortality in patients encompassing all stages of chronic liver disease from mild to moderate liver fibrosis without cirrhosis, to compensated cirrhosis, and finally decompensated cirrhosis. This study provides evidence on the existence of an immune dysfunction state that progressively increases with the progression of the disease and which is associated with the development of bacterial infections and increased mortality.

Therapeutics, received speaking fees from Grifols, Ferring and Medscape. MT has served as speaker from Echosens, Madrigal, Takeda, and Novo Nordisk, received advisory fees from Boehringer Ingelheim, Astra Zeneca, Novo Nordisk and GSK, and received research grant from GSK. MT is co-founder of Evido, and board member for Alcohol & Society (non-governmental organisation). AK has served as speaker for Novo Nordisk, Norgine, participated in advisory boards for Boehringer Ingelheim, GSK and Novo Nordisk, all outside the submitted work and received research support by Astra, Siemens, Nordic Bioscience, Echo-sense. AK is board member and co-founder of Evido. PG has received grants from Gilead & Grifols; consults or advises for Gilead, RallyBio, SeaBeLife, Merck, Sharp, and Dohme (MSD), Ocelot Bio, Behring, Roche Diagnostics International, and Boehringer Ingelheim; and is on the speakers' bureau for Pfizer. WL reported receipt of consultancy and/or speaker fees from CSL Behring, Cook, Boston Scientific, and MRM Health. UB reported receipt of personal fees from Abacus, Amgen, Behring, GSK, and Zambon. PA reported advisory board membership for BioVie, Genfit, and BioMarin and speaker invitation from Kedrion and Grifols; in addition, PA had a patent licensed to BioVie for telipressin in refractory ascites. VV reported receipt of personal fees from Ipsen and Orphan.

Please refer to the accompanying ICMJE disclosure forms for further details.

## Authors' contributions

The authors listed above have all contributed to this manuscript and approve the version of this submission. AJ, EP, ES, PG contributed to the conception and design of the study, acquisition of data, the analysis and interpretation of the data and drafting the manuscript; GM, EP, MJM, SI, RG, SJ, NT, MI, NJE, JAC, JR, JGG, AS, AC, MPG, MC, RN, MT, TH, ES, YH, VV, GZ, CA, FEU, UB, CF, RPM, WL, CS, RF, BC, XA, MC, IG, NF, MMR, MT, AK, PA and SP participated in the generation and collection of data, assembly of data, analyses of the results, interpretation of data, and/or critical revision of the manuscript for important intellectual content.

## Data availability

The data supporting the findings of this study are not publicly available. Data will only be shared upon reasonable request to the Principal Investigator (PI). Interested researchers must contact the PI directly, outlining the purpose and scope



of the intended use. Access may be granted at the discretion of the PI and may require additional agreements to ensure data confidentiality and ethical use.

## Supplementary data

Supplementary data to this article can be found online at <https://doi.org/10.1016/j.jhepr.2025.101597>.

## References

*Author names in bold designate shared co-first authorship*

- [1] Ginès P, Krag A, Abraldes JG, et al. Liver cirrhosis. *The Lancet* 2021;398:1359–1376.
- [2] Bajaj JS, Kamath PS, Reddy KR. The evolving challenge of infections in cirrhosis. *New Engl J Med* 2021;384:2317–2330.
- [3] Piano S, Bunchorntavakul C, Marciano S, et al. Infections in cirrhosis. *Lancet Gastroenterol Hepatol* 2024;9:745–757.
- [4] Trebicka J, Macnaughtan J, Schnabl B, et al. The microbiota in cirrhosis and its role in hepatic decompensation. *J Hepatol* 2021;75:S67–S81.
- [5] Albillos A, de Gottardi A, Rescigno M. The gut-liver axis in liver disease: pathophysiological basis for therapy. *J Hepatol* 2020;72:558–577.
- [6] Albillos A, Lario M, Álvarez-Mon M. Cirrhosis-associated immune dysfunction: distinctive features and clinical relevance. *J Hepatol* 2014;61:1385–1396.
- [7] **Costa D, Simbrunner B**, Jachs M, et al. Systemic inflammation increases across distinct stages of advanced chronic liver disease and correlates with decompensation and mortality. *J Hepatol* 2021;74:819–828.
- [8] Albillos A, Martín-Mateos R, Van der Merwe S, et al. Cirrhosis-associated immune dysfunction. *Nat Rev Gastroenterol Hepatol* 2022;19:112–134.
- [9] **Arroyo V, Angeli P, Moreau R**, et al. The systemic inflammation hypothesis: towards a new paradigm of acute decompensation and multiorgan failure in cirrhosis. *J Hepatol* 2021;74:670–685.
- [10] Sharpe AH, Pauken KE. The diverse functions of the PD1 inhibitory pathway. *Nat Rev Immunol* 2018;18:153–167.
- [11] Pose E, Coll M, Martínez-Sánchez C, et al. Programmed death ligand 1 is overexpressed in liver macrophages in chronic liver diseases, and its blockade improves the antibacterial activity against infections. *Hepatology* 2021;74:296–311.
- [12] Markwick LJJ, Riva A, Ryan JM, et al. Blockade of PD1 and TIM3 restores innate and adaptive immunity in patients with acute alcoholic hepatitis. *Gastroenterology* 2015;148:590–602.e10.
- [13] Pose E, Jiménez C, Zaccherini G, et al. Simvastatin and rifaximin in decompensated cirrhosis. *JAMA* 2025;334:366.
- [14] **Johansen S, Langkjær S**, Rasmussen DN, et al. Infections increase the risk of decompensation and death in patients with early alcohol-related liver disease. *JHEP Rep* 2024;6:101016.
- [15] Jalan R, Fernandez J, Wiest R, et al. Bacterial infections in cirrhosis: a position statement based on the EASL Special Conference 2013. *J Hepatol* 2014;60:1310–1324.
- [16] European Association for the Study of the Liver. EASL Clinical Practice Guidelines for the management of patients with decompensated cirrhosis. *J Hepatol* 2018;69:406–460.
- [17] Bernal W, Karvellas C, Saliba F, et al. Intensive care management of acute-on-chronic liver failure. *J Hepatol* 2021;75:S163–S177.
- [18] **Fernández J, Piano S, Bartoletti M**, et al. Management of bacterial and fungal infections in cirrhosis: the MDRO challenge. *J Hepatol* 2021;75:S101–S117.
- [19] Bailly C, Thuru X, Quesnel B. Soluble programmed death ligand-1 (sPD-L1): a pool of circulating proteins implicated in Health and diseases. *Cancers (Basel)* 2021;13:3034.
- [20] Sloan A, Song Y, Gail MH, et al. Design and analysis considerations for combining data from multiple biomarker studies. *Stat Med* 2019;38:1303–1320.
- [21] Weng H-Y, Hsueh Y-H, Messam LIMCV, et al. Methods of covariate selection: directed acyclic graphs and the change-in-estimate procedure. *Am J Epidemiol* 2009;169:1182–1190.
- [22] von Elm E, Altman DG, Egger M, et al. The Strengthening the Reporting of Observational Studies in Epidemiology (STROBE) statement: guidelines for reporting observational studies. *Lancet* 2007;370:1453–1457.
- [23] Pauken KE, Torchia JA, Chaudhri A, et al. Emerging concepts in PD-1 checkpoint biology. *Semin Immunol* 2021;52:101480.
- [24] **Qin W, Hu L, Zhang X**, et al. The diverse function of PD-1/PD-L pathway beyond cancer. *Front Immunol* 2019;10.
- [25] Derigs M, Heers H, Lingelbach S, et al. Soluble PD-L1 in blood correlates positively with neutrophil and negatively with lymphocyte mRNA markers and implies adverse sepsis outcome. *Immunol Res* 2022;70:698–707.
- [26] Lu Y, Wang G, Li C. Expression of peripheral monocytic programmed death ligand-1 in severe sepsis combined with HBV-related cirrhosis. A pilot observational study. *Cent Eur J Immunol* 2021;46:217–224.
- [27] Poynard T, Zourabichvili O, Hilpert G, et al. Prognostic value of total serum bilirubin/γ-glutamyl transpeptidase ratio in cirrhotic patients. *Hepatology* 1984;4:324–327.
- [28] Ginès P, Quintero E, Arroyo V, et al. Compensated cirrhosis: natural history and prognostic factors. *Hepatology* 1987;7:122–128.

**Keywords:** Liver cirrhosis; Bacterial infection; PD-L1; Biomarkers; Decompensated cirrhosis; Mortality.

*Received 28 June 2025; received in revised form 12 September 2025; accepted 15 September 2025; Available online 18 September 2025*

## Supplemental information

### **PD-L1 and the risk of bacterial infection in patients with chronic liver diseases: An international multicohort study**

**Adrià Juanola, Gabriel Mezzano, Elisa Pose, Maria J. Moreta, Simone Incicco, Roberta Gagliardi, Stine Johansen, Nikolaj Torp, Mads Israelsen, Natalia Jiménez-Esquivel, Joaquin Castillo-Iturra, Jordi Ribera, Jordi Gratacós-Ginès, Anna Soria, Andrés Cárdenas, Martina Pérez-Guasch, Marta Cervera, Ruth Nadal, Queralt Herms, Marta Tonon, Torben Hansen, Evelina Stankevic, Yun Huang, Victor Vargas, Giacomo Zaccherini, Carlo Alessandria, Frank E. Uschner, Ulrich Beuers, Claire Francoz, Rajeshwar P. Mookerjee, Wim Laleman, Cristina Solé, Rafael Bañares, Berta Cuyàs, Xavi Ariza, Mar Coll, Isabel Graupera, Núria Fabrellas, Manuel Morales-Ruiz, Maja Thiele, Aleksander Krag, Paolo Angeli, Salvatore Piano, Elsa Solà, and Pere Ginès**

# **PD-L1 and the risk of bacterial infection in patients with chronic liver diseases: An international multicohort study**

Adrià Juanola, Gabriel Mezzano, Elisa Pose, Maria José Moreta, Simone Incicco, Roberta Gagliardi, Stine Johansen, Nikolaj Torp, Mads Israelsen, Natalia Jiménez-Esquivel, Joaquin Castillo-Iturra, Jordi Ribera, Jordi Gratacós-Ginès, Anna Soria, Andrés Cárdenas, Martina Pérez-Guasch, Marta Cervera, Ruth Nadal, Queralt Herms, Marta Tonon, Torben Hansen, Evelina Stankevic, Yun Huang, Victor Vargas, Giacomo Zaccherini, Carlo Alessandria, Frank E Uschner, Ulrich Beuers, Claire Francoz, Rajeshwar P Mookerjee, Wim Laleman, Cristina Solé, Rafael Bañares, Berta Cuyàs, Xavi Ariza, Mar Coll, Isabel Graupera, Núria Fabrellas, Manuel Morales-Ruiz, Maja Thiele, Aleksander Krag, Paolo Angeli, Salvatore Piano, Elsa Solà, Pere Ginès.

Table of contents

|                            |    |
|----------------------------|----|
| Supplementary figures..... | 2  |
| Supplementary tables.....  | 11 |

## Supplementary figures

**Fig. S1.- Soluble PD-L1 (sPD-L1) levels across clinical stages of decompensated cirrhosis among patients from Cohorts 1 and 2.** Boxplots represent the interquartile range (IQR) with horizontal lines indicating the 25th and 75th percentiles. Individual dots represent patient-level sPD-L1 values. Pairwise comparisons were performed using Wilcoxon rank-sum tests.

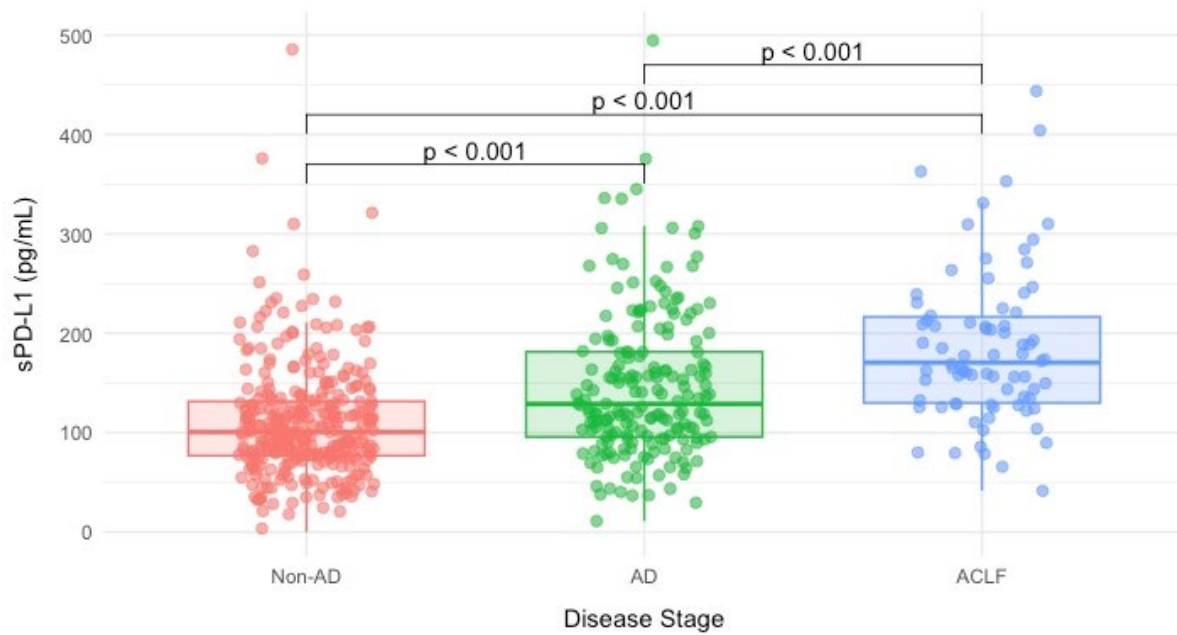



**Fig. S2.- Cumulative incidence curves of bacterial infections in patients from cohort 2 categorized according to sPD-L1 median levels.** The blue curve represents patients with sPD-L1 < 147 pg/mL, and the red curve represents those with sPD-L1 ≥ 147 pg/mL. The log-rank test was used to compare survival distributions between groups, with a statistically significant difference observed (p < 0.001). Number at risk is displayed below the time axis.

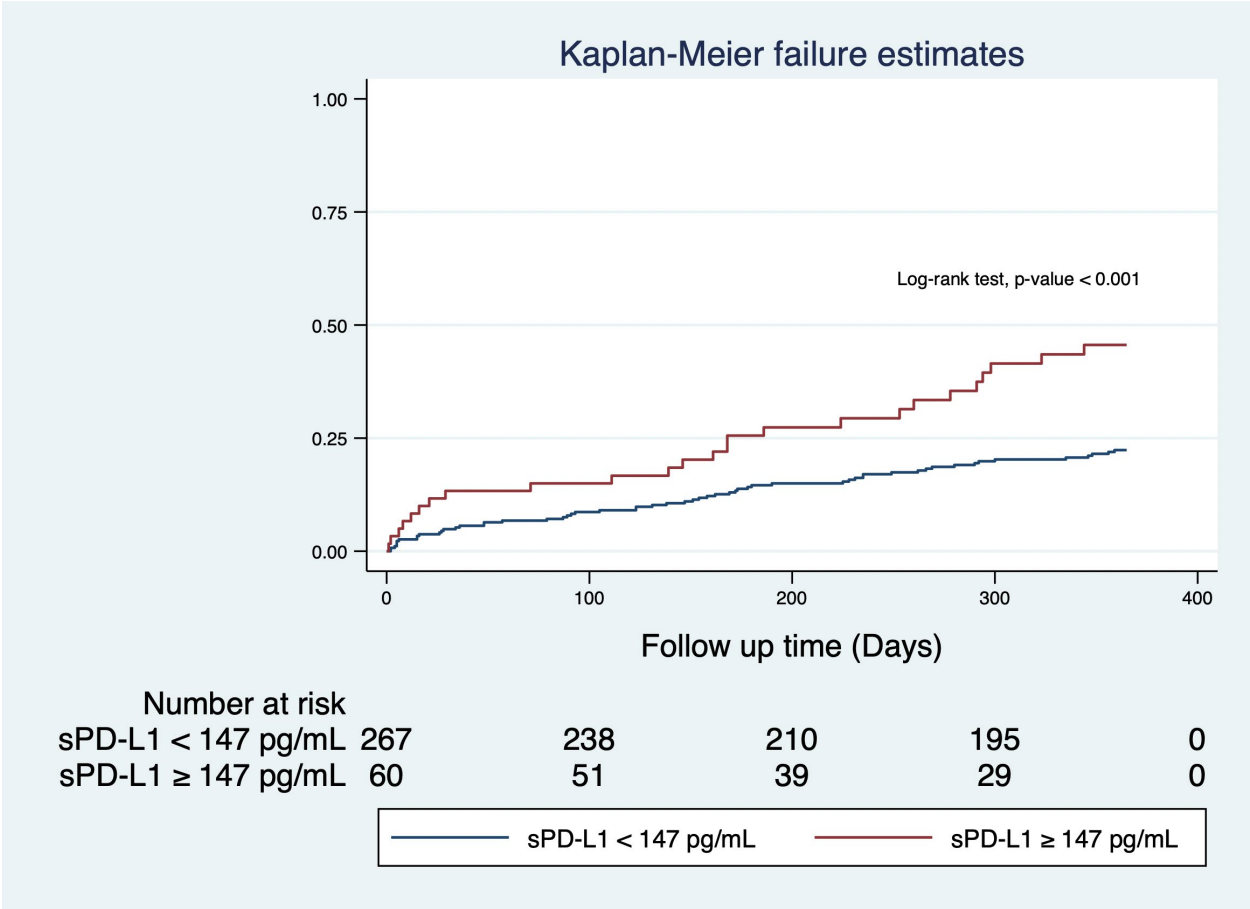

**Fig. S3.- Soluble PD-L1 adjusted HR with potential confounders identified in the univariate analysis for bacterial infection development in patients from Cohort 3.** Each diamond represents the adjusted hazard ratio (HR) of sPD-L1 when accounting for the indicated variable, based on a Cox proportional hazards model. The blue horizontal lines indicate the 95%CI for each adjusted HR. The grey dashed vertical line marks the unadjusted HR of sPD-L1, and the grey dotted lines represent its corresponding 95%CI. Variables included in this analysis were selected based on significance in the univariate analysis.

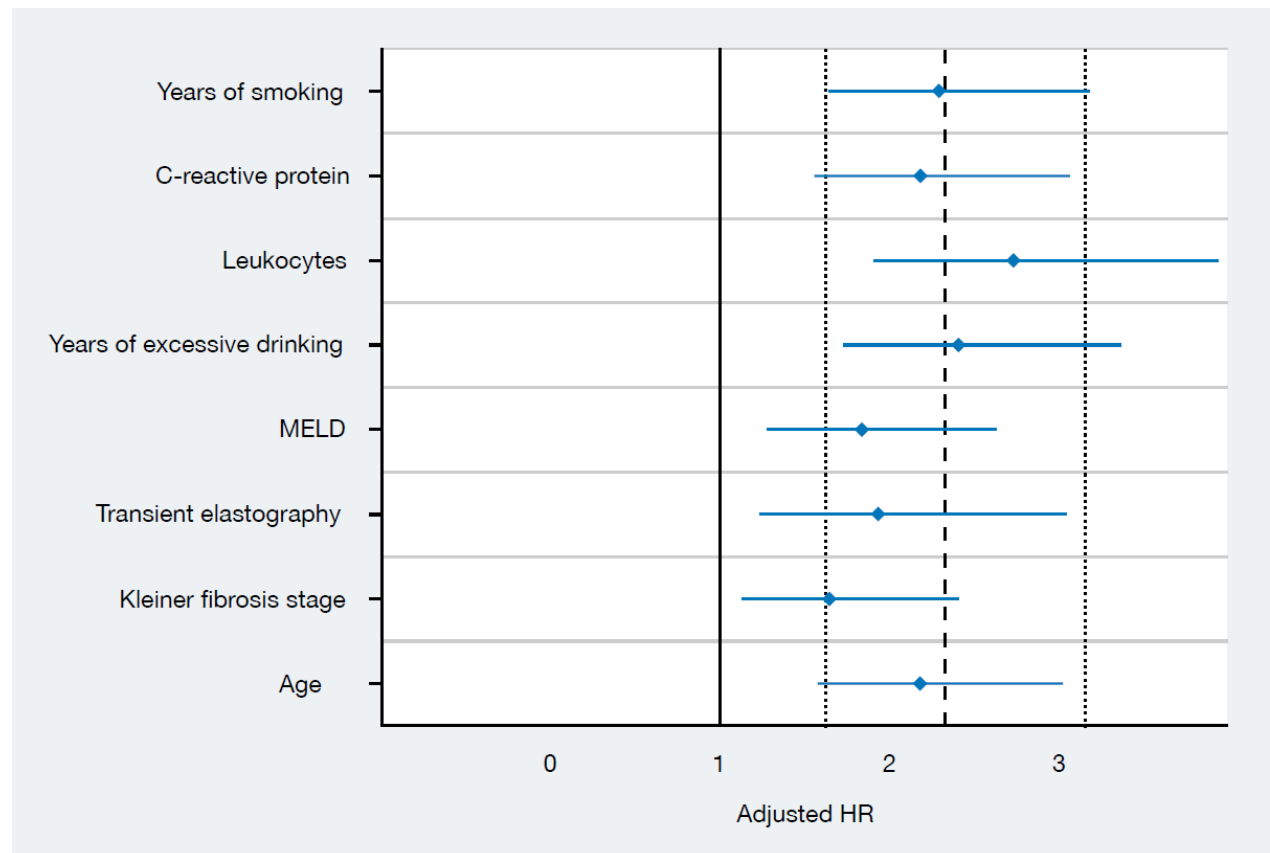

**Fig. S4.- Cumulative incidence curves of bacterial infections in patients from cohort 3 categorized according to sPD-L1 median level.** The blue curve represents patients with sPD-L1 < 5.7, and the red curve represents those with sPD-L1 ≥ 5.7. The log-rank test was used to compare survival distributions between groups, with a statistically significant difference observed ( $p < 0.001$ ). Number at risk is displayed below the time axis.

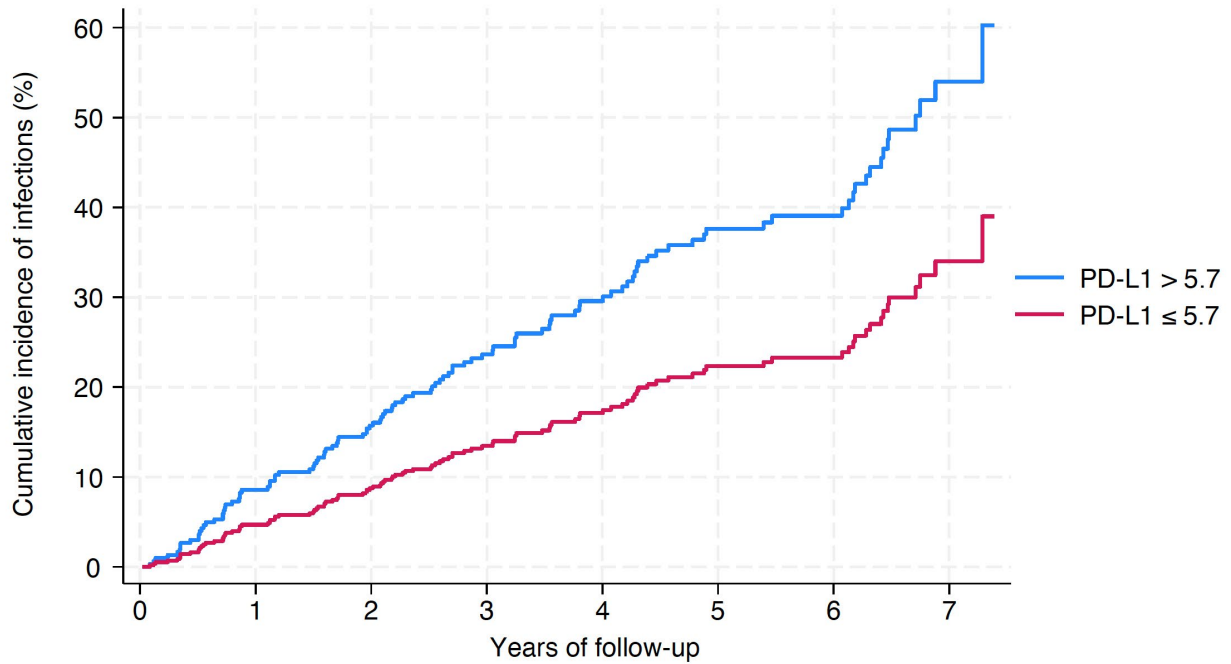

**Fig. S5.- Soluble PD-L1 adjusted HR with potential confounders identified in the univariate analysis for 90-day mortality in patients from Cohort 1.** Each diamond represents the adjusted hazard ratio (HR) of sPD-L1 when accounting for the indicated variable, based on a Cox proportional hazards model. The blue horizontal lines indicate the 95%CI for each adjusted HR. The grey dashed vertical line marks the unadjusted HR of sPD-L1, and the grey dotted lines represent its corresponding 95%CI. Variables included in this analysis were selected based on significance in the univariate analysis.

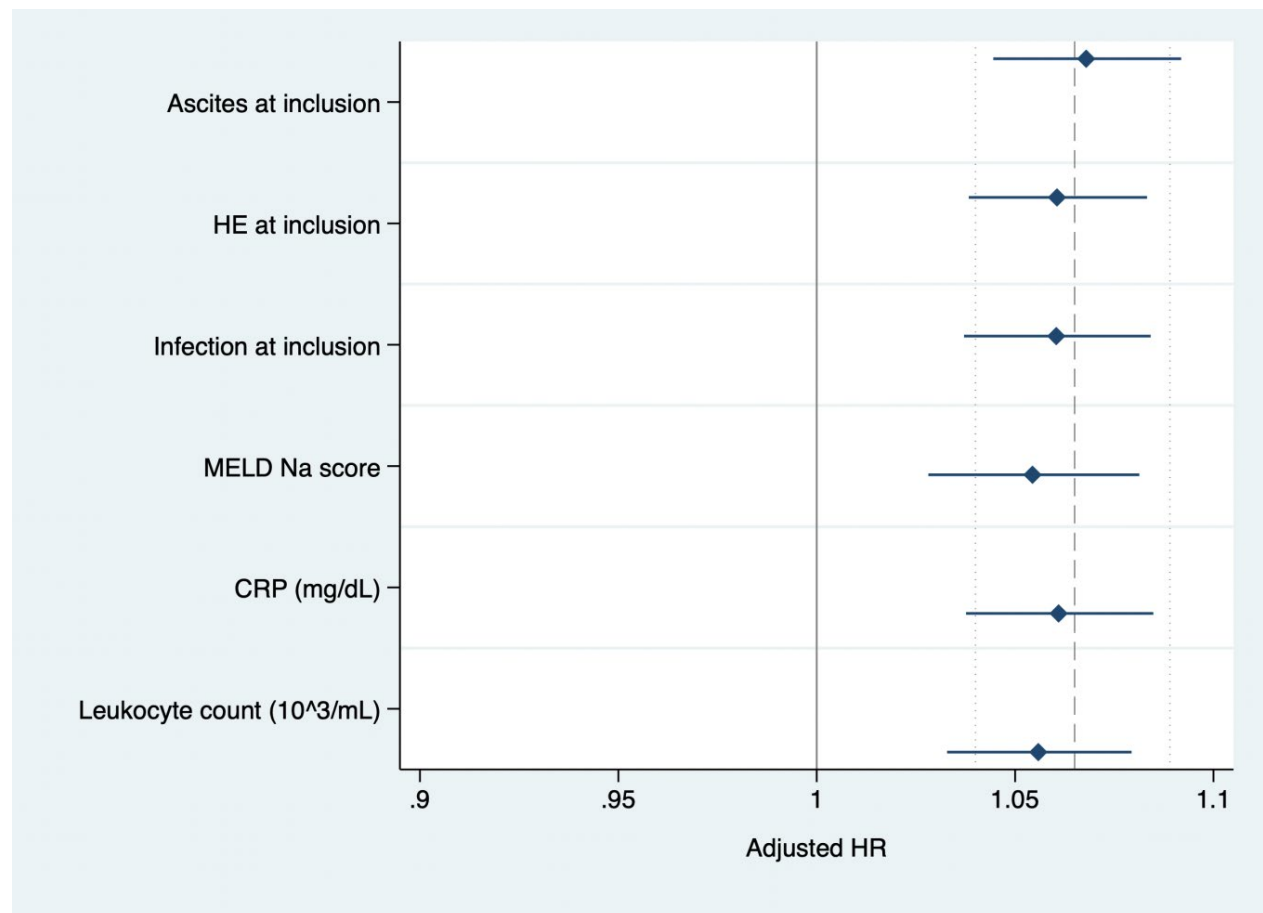



**Fig. S6.- Soluble PD-L1 adjusted HR with potential confounders identified in the univariate analysis for 1-year mortality in patients from Cohort 2.** Each diamond represents the adjusted hazard ratio (HR) of sPD-L1 when accounting for the indicated variable, based on a Cox proportional hazards model. The blue horizontal lines indicate the 95%CI for each adjusted HR. The grey dashed vertical line marks the unadjusted HR of sPD-L1, and the grey dotted lines represent its corresponding 95%CI. Variables included in this analysis were selected based on significance in the univariate analysis.

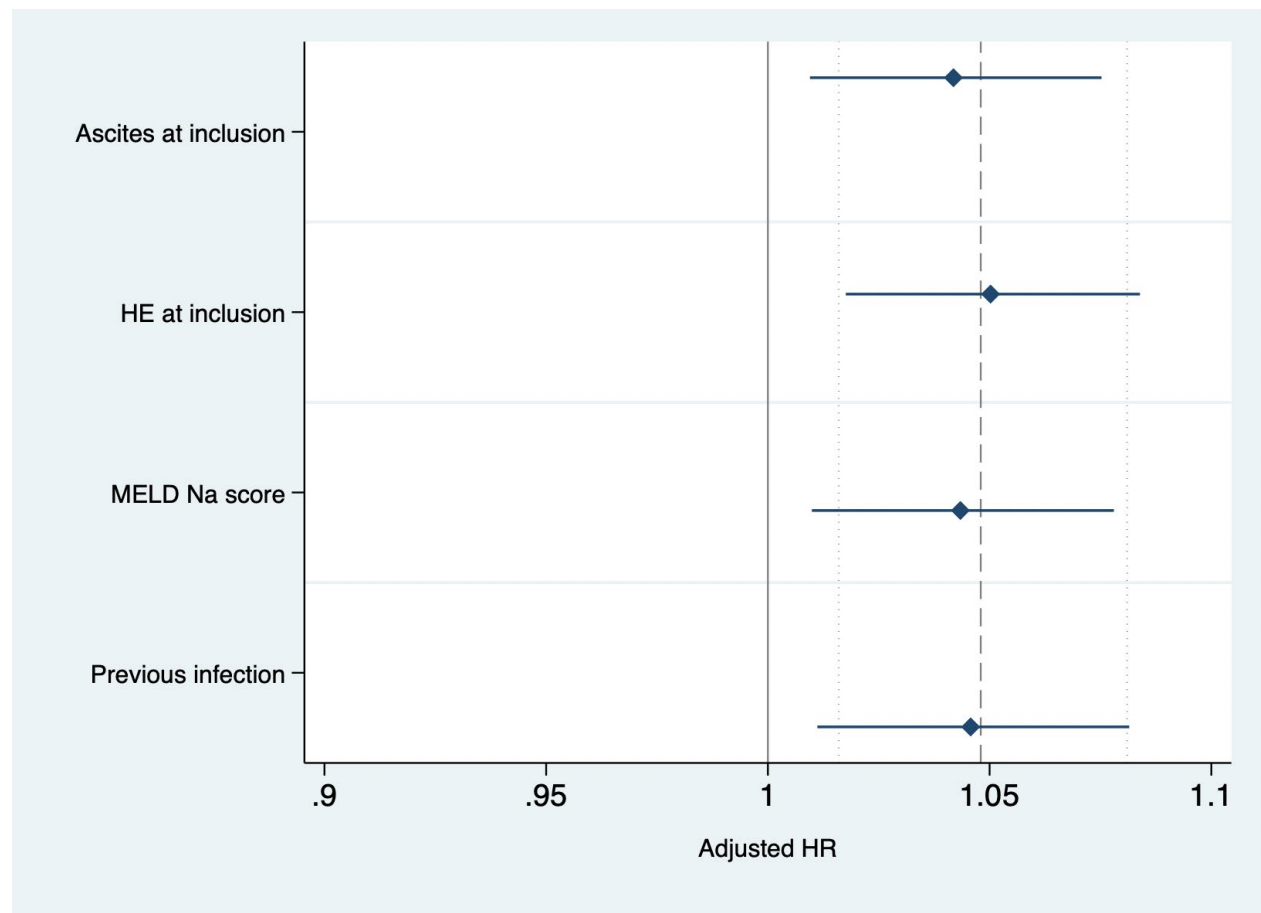

**Fig. S7.- Kaplan–Meier survival curves in patients from Cohort 2 categorized by median sPD-L1 plasma levels.** Kaplan–Meier survival estimates for 1-year mortality in patients from Cohort 2 stratified by soluble PD-L1 (sPD-L1) plasma levels using the cut-off value of 147 pg/mL. The blue curve represents patients with sPD-L1 < 147 pg/mL, and the red curve represents those with sPD-L1 ≥ 147 pg/mL. The log-rank test was used to compare survival distributions between groups, with a statistically significant difference observed (p = 0.0185). Number at risk is displayed below the time axis.

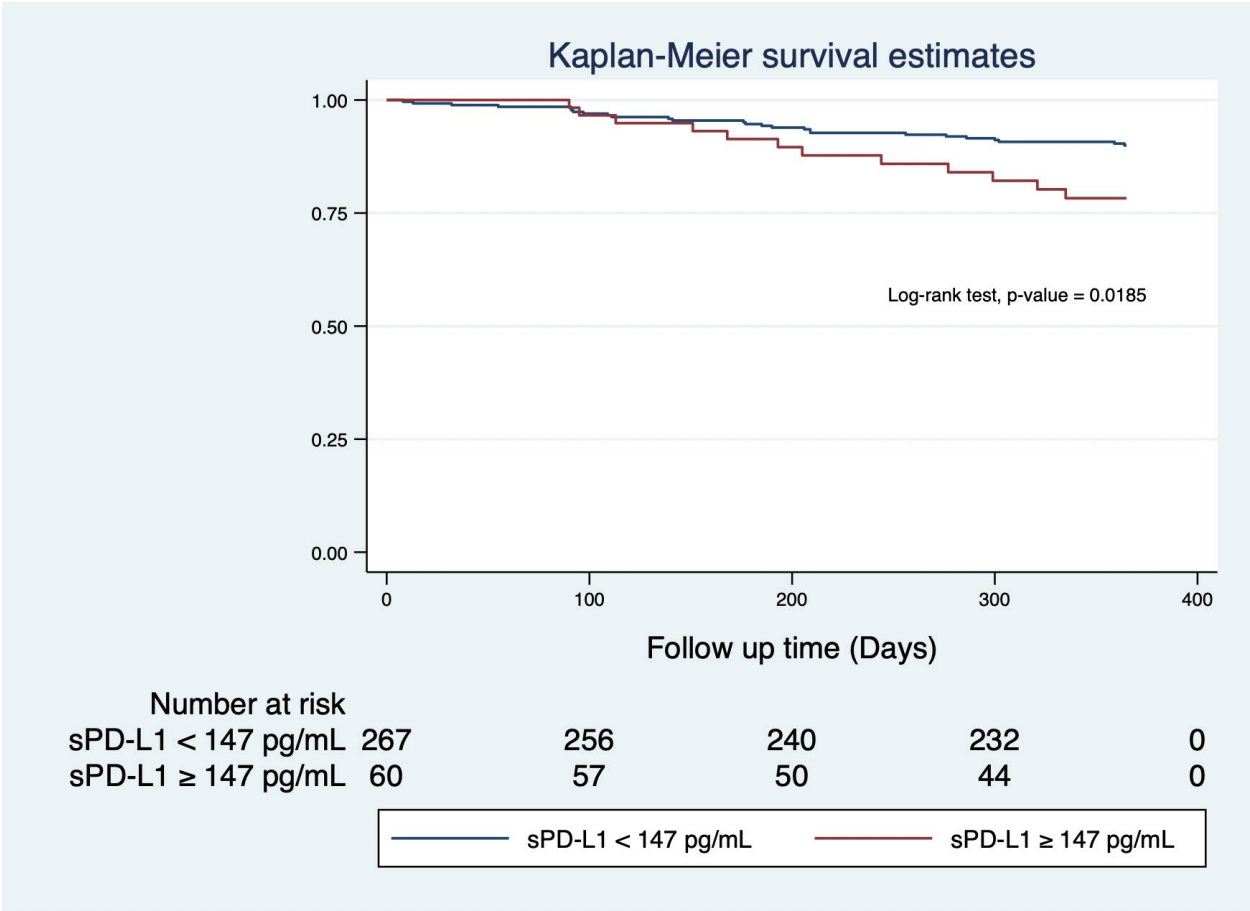

**Fig. S8.- Soluble PD-L1 adjusted HR with potential confounders identified in the univariate analysis for mortality in patients from Cohort 3.** Each diamond represents the adjusted hazard ratio (HR) of sPD-L1 when accounting for the indicated variable, based on a Cox proportional hazards model. The blue horizontal lines indicate the 95%CI for each adjusted HR. The grey dashed vertical line marks the unadjusted HR of sPD-L1, and the grey dotted lines represent its corresponding 95%CI. Variables included in this analysis were selected based on significance in the univariate analysis.

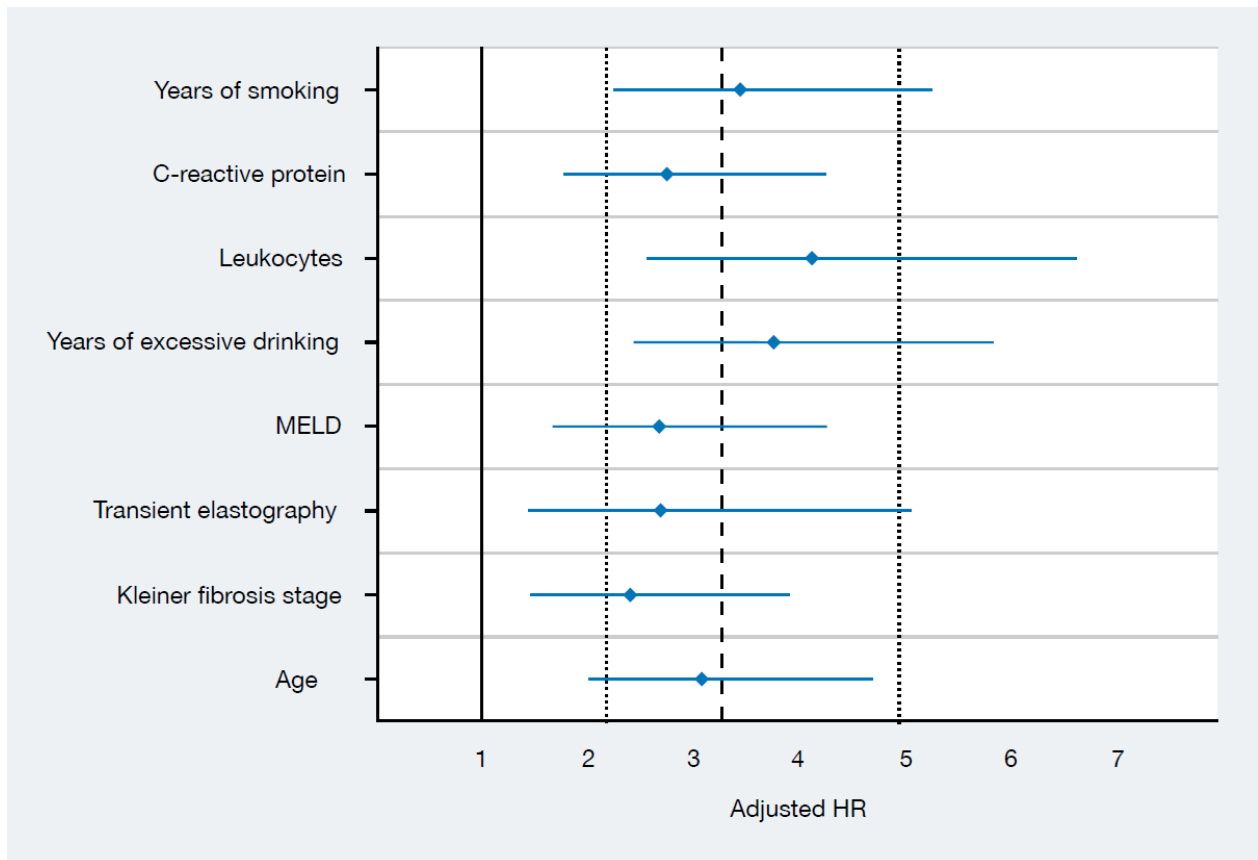

**Fig. S9.- Kaplan Meier survival curves in patients from cohort 3 categorized according to sPD-L1 median levels.** The dark blue curve represents patients with sPD-L1 < 5.7, and the light blue curve represents those with sPD-L1 ≥ 5.7. The log-rank test was used to compare survival distributions between groups, with a statistically significant difference observed (p < 0.001). Number at risk is displayed below the time axis.

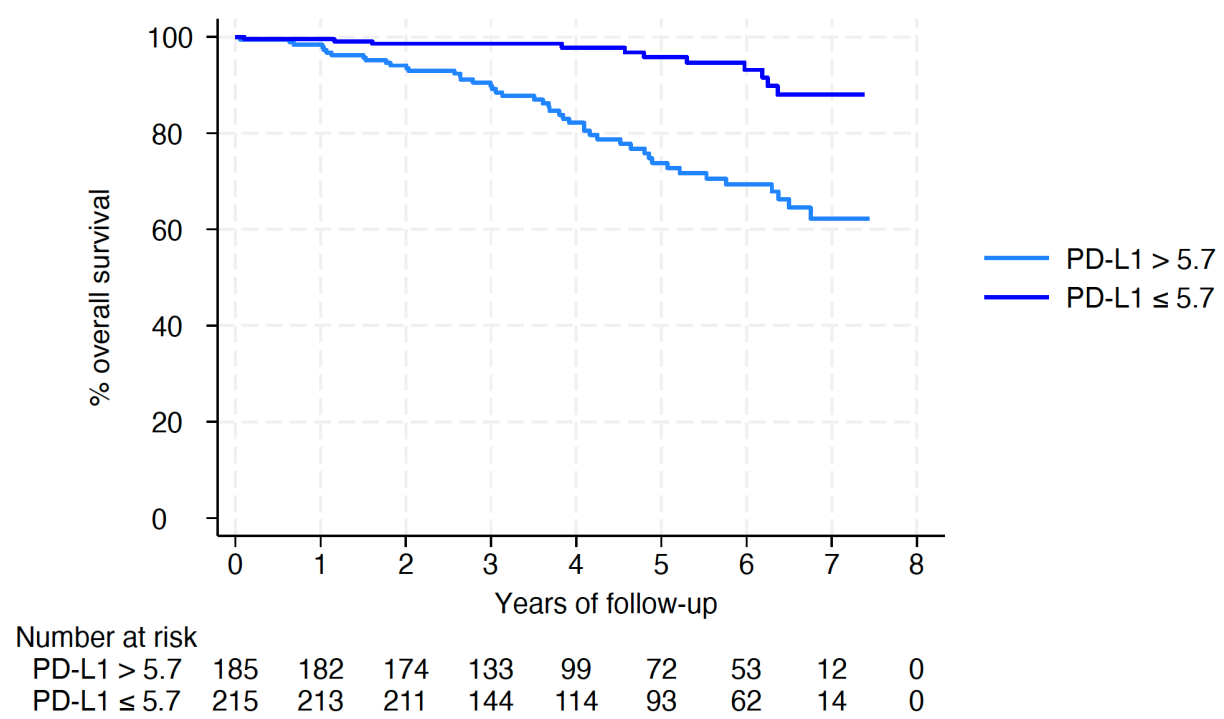



## Supplementary tables

**Table S1 – Inclusion and Exclusion Criteria for the Different Cohorts.**

| Inclusion Criteria                                                                                                                                                    | Exclusion Criteria                                                                                                                                                                                                                                                                                                                                                                                                                                                                                                                                                                                                                                                                                                                                                                                                                                                                                                                                                                                                                                           |
|-----------------------------------------------------------------------------------------------------------------------------------------------------------------------|--------------------------------------------------------------------------------------------------------------------------------------------------------------------------------------------------------------------------------------------------------------------------------------------------------------------------------------------------------------------------------------------------------------------------------------------------------------------------------------------------------------------------------------------------------------------------------------------------------------------------------------------------------------------------------------------------------------------------------------------------------------------------------------------------------------------------------------------------------------------------------------------------------------------------------------------------------------------------------------------------------------------------------------------------------------|
| <b>Cohort 1 (n = 268)</b>                                                                                                                                             |                                                                                                                                                                                                                                                                                                                                                                                                                                                                                                                                                                                                                                                                                                                                                                                                                                                                                                                                                                                                                                                              |
| Patients with decompensated cirrhosis hospitalized for management of an acute decompensation episode; or, patients with liver cirrhosis visited at outpatient clinic. | <ul style="list-style-type: none"> <li>(1) hemodialysis before admission</li> <li>(2) liver and/or kidney transplantation</li> <li>(3) admission for elective diagnostic or therapeutic procedures</li> <li>(4) advanced hepatocellular carcinoma beyond Milan criteria</li> <li>(5) severe extrahepatic diseases with poor short-term prognosis.</li> </ul>                                                                                                                                                                                                                                                                                                                                                                                                                                                                                                                                                                                                                                                                                                 |
| <b>Cohort 2: Patients from the Liverhope Efficacy Trial (n = 214)</b>                                                                                                 |                                                                                                                                                                                                                                                                                                                                                                                                                                                                                                                                                                                                                                                                                                                                                                                                                                                                                                                                                                                                                                                              |
| Patients 18 years of age or older, with a clinical diagnosis of decompensated cirrhosis, namely Child-Pugh class B or C.                                              | <ul style="list-style-type: none"> <li>(1) presence of ACLF at enrollment</li> <li>(2) serum bilirubin &gt;5 mg/dL (85.5 µmol/L)</li> <li>(3) INR ≥2.5</li> <li>(4) severe alcohol-associated hepatitis requiring corticosteroid therapy</li> <li>(5) overt HE</li> <li>(6) Child-Pugh score ≥ 13.</li> <li>(7) severe extrahepatic comorbidities, including congestive heart failure New York Heart Association Grade III/IV, chronic obstructive pulmonary disease Global Initiative for Chronic Obstructive Lung Disease group 2 or higher</li> <li>(8) serum creatinine &gt;2mg/dL (176.8 µmol/L) or on renal replacement therapy</li> <li>(9) patients on treatment with rifaximin or statins</li> <li>(10) increased risk of adverse events related to the study medications (i.e treatment with potent inhibitors of CYP3A4) or hypersensitivity to study drugs were excluded.</li> <li>(11) patients unable to provide consent or with anticipated poor compliance</li> <li>(12) alcohol consumption ≥3 units per day were also excluded.</li> </ul> |
|                                                                                                                                                                       |                                                                                                                                                                                                                                                                                                                                                                                                                                                                                                                                                                                                                                                                                                                                                                                                                                                                                                                                                                                                                                                              |

| <b>Cohort 2: Patients from Padova Cohort (n = 113)</b>                                                                                                                                                                                                                                                                                   |                                                                                                                                                                                                                                                                                                                                                                                                                                                                                                              |
|------------------------------------------------------------------------------------------------------------------------------------------------------------------------------------------------------------------------------------------------------------------------------------------------------------------------------------------|--------------------------------------------------------------------------------------------------------------------------------------------------------------------------------------------------------------------------------------------------------------------------------------------------------------------------------------------------------------------------------------------------------------------------------------------------------------------------------------------------------------|
| <p>(1) Age &gt;18 years;</p> <p>(2) Non-acute decompensated cirrhosis diagnosed by histological findings on biopsy, or by the evidence of clinical, biohumoral or instrumental data (endoscopic, ultrasound or liver stiffness measured by transient elastography);</p> <p>(3) Ability and will to provide written informed consent.</p> | <p>(1) diagnosis of hepatocellular carcinoma (HCC) or extrahepatic malignancies at the time of inclusion;</p> <p>(2) other highly disabling pathologies of extrahepatic origin at the time of inclusion (e.g. heart failure [NYHA class <math>\geq 3</math>] or GOLD chronic obstructive pulmonary disease grade <math>\geq 3</math>);</p> <p>(3) recurrence of cirrhosis after liver transplantation (LT);</p> <p>(4) refusal, or inability of the patient to provide informed consent.</p>                 |
| <b>Cohort 3: GALA-ALD cohort (n = 400)</b>                                                                                                                                                                                                                                                                                               |                                                                                                                                                                                                                                                                                                                                                                                                                                                                                                              |
| <p>(1) Age 18-75 years</p> <p>(2) Prior or current chronic alcohol overuse defined as &gt;24 g/d for women and &gt;36 g/d for men for &gt;1 year</p> <p>(3) Informed consent</p>                                                                                                                                                         | <p>(1) Previous or current decompensation<br/>Concurrent liver disease other than ALD</p> <p>(2) Cancer or other debilitating disease with an expected survival of &lt;12 months</p> <p>(3) Severe alcoholic hepatitis, hepatic congestion or bile duct dilation evidenced by ultrasound</p> <p>(4) Positive for human immunodeficiency virus</p> <p>(5) Ongoing substance abuse other than alcohol</p> <p>(6) Contraindication to a liver biopsy</p> <p>(7) Inability to comply with the study protocol</p> |

**Table S2 - Type distribution of the first bacterial infection during follow-up.**

| <b>Type of First Infection</b>           | <b>Cohort 1<br/>(n = 268)</b> | <b>Cohort 2<br/>(n = 327)</b> | <b>Cohort 3<br/>(n = 400)</b> |
|------------------------------------------|-------------------------------|-------------------------------|-------------------------------|
| <b>Urinary Tract Infection</b>           | 36 (36)                       | 15 (27)                       | 16 (15)                       |
| <b>Respiratory tract infection</b>       | 21 (21)                       | 5 (9)                         | 41 (38)                       |
| <b>Spontaneous bacteremia</b>            | 11 (11)                       | 5 (9)                         | 8 (7)                         |
| <b>Spontaneous bacterial peritonitis</b> | 9 (9)                         | 12 (22)                       | 2 (2)                         |
| <b>Skin &amp; Soft tissue infection</b>  | 9 (9)                         | 8 (15)                        | 13 (12)                       |
| <b>Other</b>                             | 15 (14)                       | 10 (18)                       | 28 (26)                       |

**Table S3.- Univariate analysis for factors associated with 3-month bacterial infection development in patients from Cohort 1.** Hazard ratios (HR) and corresponding 95% confidence intervals (CI) were estimated using Cox proportional hazards models. P-values correspond to the Wald test for the significance of each covariate.

| Variable                                            | No Infection during follow-up (n = 167) | Infection during follow-up (n = 101) | HR (95%CI)            | p value |
|-----------------------------------------------------|-----------------------------------------|--------------------------------------|-----------------------|---------|
| Age                                                 | 60 (53 - 67)                            | 60 (52 - 65)                         | 0.997 (0.980 - 1.015) | 0.764   |
| Sex                                                 | 45 (27)                                 | 28 (28)                              | 0.977 (0.632 - 1.510) | 0.916   |
| <b>Etiology</b>                                     |                                         |                                      |                       |         |
| Alcohol                                             | 102 (61)                                | 63 (62)                              | Ref.                  | Ref.    |
| HVC                                                 | 27 (16)                                 | 11 (11)                              | 0.639 (0.337 - 1.213) | 0.171   |
| Alcohol + Viral                                     | 13 (8)                                  | 8 (8)                                | 1.090 (0.522 - 2.274) | 0.819   |
| MASLD                                               | 10 (6)                                  | 12 (12)                              | 1.489 (0.802 - 2.761) | 0.207   |
| Other                                               | 15 (9)                                  | 7 (7)                                | 0.757 (0.347 - 1.654) | .0486   |
| Ascites at inclusion                                | 104 (62)                                | 75 (74)                              | 1.794 (1.147 - 2.804) | 0.010   |
| HE at inclusion                                     | 50 (30)                                 | 44 (44)                              | 1.841 (1.240 - 2.734) | 0.002   |
| Previous infection                                  | 42 (25)                                 | 48 (48)                              | 1.917 (1.296 - 2.833) | 0.001   |
| Infection at inclusion                              | 86 (52)                                 | 59 (58)                              | 1.338 (0.900 - 1.988) | 0.150   |
| Bilirubin (mg/dL)                                   | 2.4 (1.2 - 5.4)                         | 3.2 (1.6 - 9.1)                      | 1.045 (1.023 - 1.067) | <0.001  |
| INR                                                 | 1.46 (1.28 - 1.79)                      | 1.70 (1.43 - 2.03)                   | 1.168 (1.015 - 1.344) | 0.030   |
| Albumin (g/L)                                       | 29 (25 - 33)                            | 28 (25 - 32)                         | 0.986 (0.952 - 1.022) | 0.450   |
| Creatinine (mg/dL)                                  | 0.93 (0.60 - 1.45)                      | 1.17 (0.70 - 2.02)                   | 1.294 (1.135 - 1.475) | <0.001  |
| Serum Na (mEq/L)                                    | 137 (133 - 140)                         | 135 (132 - 138)                      | 0.926 (0.893 - 0.959) | <0.001  |
| Leukocyte count (10 <sup>3</sup> /mm <sup>3</sup> ) | 5.3 (3.6 - 7.8)                         | 5.9 (4.2 - 8.7)                      | 1.055 (1.021 - 1.091) | 0.001   |
| CRP (mg/dL)                                         | 1.9 (0.8 - 4.9)                         | 2.8 (1.2 - 5.1)                      | 1.037 (0.994 - 1.081) | 0.089   |
| MELD Na score                                       | 19 (15 - 25)                            | 24 (19 - 29)                         | 1.090 (1.062 - 1.118) | <0.001  |
| sPD-L1 (pg/mL)                                      | 136 (97 - 193)                          | 159 (116 - 221)                      | 1.034 (1.014 - 1.055) | 0.001   |



**Table S4.- Univariate analysis for factors associated with 1-year bacterial infection development in patients from Cohort 2.** Hazard ratios (HR) and corresponding 95% confidence intervals (CI) were estimated using Cox proportional hazards models. P-values correspond to the Wald test for the significance of each covariate.

| Variable                                            | No Infection during follow-up (n = 245) | Infection during follow-up (n = 82) | HR (95%IC)            | p value |
|-----------------------------------------------------|-----------------------------------------|-------------------------------------|-----------------------|---------|
| Age                                                 | 58 (52 - 64)                            | 59 (53 - 68)                        | 1.020 (0.998 - 1.042) | 0.080   |
| Sex                                                 | 62 (25)                                 | 23 (28)                             | 1.031 (0.637 - 1.670) | 0.900   |
| <b>Etiology</b>                                     |                                         |                                     |                       |         |
| Alcohol                                             | 185 (75)                                | 48 (59)                             | Ref.                  | Ref.    |
| HVC                                                 | 14 (6)                                  | 9 (11)                              | 2.102 (1.031 - 4.284) | 0.041   |
| Alcohol +                                           | 6 (2)                                   | 2 (2)                               | 1.282 (0.312 - 5.276) | 0.731   |
| Viral                                               | 14 (6)                                  | 12 (15)                             | 2.430 (1.288 - 4.582) | 0.006   |
| MASLD                                               | 26 (11)                                 | 11 (13)                             | 1.432 (0.743 - 2.759) | 0.284   |
| Other                                               |                                         |                                     |                       |         |
| Ascites at inclusion                                | 155 (63)                                | 71 (87)                             | 3.287 (1.741 - 6.206) | < 0.001 |
| HE at inclusion                                     | 11 (4)                                  | 27 (33)                             | 2.645 (1.363 - 5.133) | 0.004   |
| Previous infection                                  | 35 (14)                                 | 32 (39)                             | 3.127 (2.005 - 4.878) | < 0.001 |
| Bilirubin (mg/dL)                                   | 1.9 (1.2 - 2.8)                         | 2.2 (1.4 - 3.4)                     | 1.237 (1.102 - 1.388) | < 0.001 |
| INR                                                 | 1.31 (1.18 - 1.47)                      | 1.34 (1.22 - 1.44)                  | 0.879 (0.531 - 1.457) | 0.618   |
| Creatinine (mg/dL)                                  | 0.78 (0.66 - 0.94)                      | 0.83 (0.66 - 1.05)                  | 0.987 (0.847 - 1.151) | 0.871   |
| Serum Na (mEq/L)                                    | 138 (135 - 139)                         | 136 (134 - 138)                     | 0.937 (0.892 - 0.984) | 0.010   |
| Leukocyte count (10 <sup>3</sup> /mm <sup>3</sup> ) | 5.3 (3.9 - 6.7)                         | 4.8 (4.0 - 6.6)                     | 0.971 (0.878 - 1.073) | 0.562   |
| MELD Na score                                       | 13 (9 - 16)                             | 15 (10 - 18)                        | 1.052 (1.015 - 1.089) | 0.005   |
| sPD-L1 (pg/mL)                                      | 92 (75 - 126)                           | 116 (93 - 161)                      | 1.042 (1.020 - 1.066) | < 0.001 |

**Table S5 – Univariate analysis for factors associated to bacterial infection development in patients from Cohort 3.** Hazard ratios (HR) and corresponding 95% confidence intervals (CI) were estimated using Cox proportional hazards models. P-values correspond to the Wald test for the significance of each covariate.

| <b>Variable</b>                                 | <b>No Infection FU<br/>(N = 292)</b> | <b>Infection FU<br/>(N = 108)</b> | <b>HR (95%IC)</b> | <b>p value</b> |
|-------------------------------------------------|--------------------------------------|-----------------------------------|-------------------|----------------|
| <b>Age</b>                                      | 57 (50-63)                           | 59 (52-66)                        | 1.02 (1.00-1.04)  | 0.030          |
| <b>Kleiner fibrosis stage<br/>F0-1/F2/F3/F4</b> | 197/59/12/24                         | 41/29/8/30                        | 1.58 (1.36-1.85)  | <0.001         |
| <b>LSM (kPa)</b>                                | 5.6 (4.4-9)                          | 10.4 (5.7-28.4)                   | 1.03 (1.02-1.03)  | <0.001         |
| <b>Years of excessive<br/>drinking</b>          | 16 (8-26)                            | 16 (8-26)                         | 1.00 (0.99-1.02)  | 0.981          |
| <b>Years of smoking</b>                         | 25 (8-37)                            | 35 (13-45)                        | 1.01 (1.00-1.02)  | 0.064          |
| <b>MELD score</b>                               | 6 (6-7)                              | 7 (6-9)                           | 1.24 (1.15-1.34)  | <0.001         |
| <b>Leukocytes (10<sup>9</sup>/L)</b>            | 6.6 (5.2-8.0)                        | 7.0 (5.3-9.2)                     | 1.04 (0.95-1.13)  | 0.377          |
| <b>CRP (mg/L)</b>                               | 2.2 (1.0-4.7)                        | 3.1 (1.6-7.6)                     | 1.00 (0.99-1.01)  | 0.758          |
| <b>PD-L1 (NPX)</b>                              | 5.6 (5.3-5.9)                        | 5.9 (5.6-6.3)                     | 2.30 (1.67-3.16)  | <0.001         |

**Table S6 - Univariate analysis for factors associated to 3-month mortality in patients from Cohort**

1. Hazard ratios (HR) and corresponding 95% confidence intervals (CI) were estimated using Cox proportional hazards models. P-values correspond to the Wald test for the significance of each covariate.

| <b>Variable</b>                                        | <b>Alive<br/>(N = 208)</b> | <b>Dead<br/>(N = 60)</b> | <b>HR (95%IC)</b>     | <b>p value</b> |
|--------------------------------------------------------|----------------------------|--------------------------|-----------------------|----------------|
| <b>Age</b>                                             | 59 (53 - 67)               | 61 (53 - 67)             | 1.003 (0.980 - 1.026) | 0.815          |
| <b>Sex</b>                                             | 57 (27)                    | 16 (27)                  | 0.960 (0.542 - 1.701) | 0.889          |
| <b>Etiology</b>                                        |                            |                          |                       |                |
| <b>Alcohol</b>                                         | 131 (63)                   | 34 (57)                  | Ref.                  | Ref.           |
| <b>HVC</b>                                             | 29 (14)                    | 9 (15)                   | 1.100 (0.528 - 2.294) | 0.798          |
| <b>Alcohol + Viral</b>                                 | 12 (6)                     | 9 (15)                   | 2.325 (1.114 - 4.850) | 0.025          |
| <b>MASLD</b>                                           | 18 (8.5)                   | 4 (6.5)                  | 0.848 (0.301 - 2.389) | 0.755          |
| <b>Other</b>                                           | 18 (8.5)                   | 4 (6.5)                  | 0.957 (0.340 - 2.698) | 0.934          |
| <b>Ascites at inclusion</b>                            | 128 (62)                   | 51 (85)                  | 3.218 (1.584 - 6.539) | 0.001          |
| <b>HE at inclusion</b>                                 | 60 (29)                    | 34 (57)                  | 2.940 (1.763 - 4.903) | <0.001         |
| <b>Previous infection</b>                              | 71 (34)                    | 19 (32)                  | 0.851 (0.494 - 1.466) | 0.561          |
| <b>Infection at inclusion</b>                          | 104 (50)                   | 41 (68)                  | 1.984 (1.151 - 3.419) | 0.014          |
| <b>Bilirubin (mg/dL)</b>                               | 2.1 (1.2 - 4.4)            | 8.7 (3.3 - 16.3)         | 1.073 (1.051 - 1.095) | <0.001         |
| <b>INR</b>                                             | 1.46 (1.28 - 1.76)         | 2.00 (1.57 - 2.34)       | 1.318 (1.167 - 1.488) | <0.001         |
| <b>Creatinine (mg/dL)</b>                              | 0.92 (.060 - 1.44)         | 1.62 (0.99 - 2.26)       | 1.404 (1.206 - 1.636) | <0.001         |
| <b>Serum Na (mEq/L)</b>                                | 136 (134 - 140)            | 134 (127 - 137)          | 0.885 (0.848 - 0.924) | <0.001         |
| <b>Leukocyte count (10<sup>3</sup>/mm<sup>3</sup>)</b> | 5.0 (3.6 - 7.3)            | 7.9 (5.3 - 12.6)         | 1.104 (1.069 - 1.139) | <0.001         |
| <b>CRP (mg/dL)</b>                                     | 1.9 (0.8 - 4.5)            | 3.1 (1.3 - 5.6)          | 1.060 (1.009 - 1.114) | 0.021          |
| <b>MELD Na score</b>                                   | 20 (15 - 24)               | 30 (24 - 34)             | 1.162 (1.126 - 1.198) | <0.001         |
| <b>sPD-L1 (pg/mL)</b>                                  | 134 (97 - 187)             | 180 (143 - 267)          | 1.066 (1.043 - 1.089) | <0.001         |

**Table S7 - Multivariate analysis for factors associated with 90-day mortality in patients from Cohort 1.** Stepwise forward Cox analysis including factors with positive association (p value < 0.05) in the univariate analysis.

| Variable                                                | p value | HR                 | 95%CI                      |
|---------------------------------------------------------|---------|--------------------|----------------------------|
| sPD-L1 (pg/mL)                                          | < 0.001 | 1.049 <sup>#</sup> | 1.023 - 1.077 <sup>#</sup> |
| MELD sodium score                                       | < 0.001 | 1.122              | 1.090 - 1.155              |
| Leukocyte count<br>(x10 <sup>3</sup> /mm <sup>3</sup> ) | 0.004   | 1.053              | 1.016 - 1.091              |
| HE at inclusion                                         | 0.030   | 1.816              | 1.061 - 3.110              |

<sup>#</sup>HR evaluated per 10 units

CRP, C-reactive protein; HE, hepatic encephalopathy; HR, hazard ratio; MELD, model for end-stage liver disease; sPD-L1, soluble programmed death-ligand 1.

**Table S8 - Univariate analysis for factors associated to 1-year mortality in patients from Cohort 2.** Hazard ratios (HR) and corresponding 95% confidence intervals (CI) were estimated using Cox proportional hazards models. P-values correspond to the Wald test for the significance of each covariate.

| Variable             | Alive<br>(N = 289) | Dead<br>(N = 38) | HR (95%CI)            | p value |
|----------------------|--------------------|------------------|-----------------------|---------|
| Age                  | 58 (52 - 64)       | 62 (54 - 69)     | 1.032 (0.999 - 1.065) | 0.056   |
| Sex                  | 77 (27)            | 8 (21)           | 0.718 (0.329 - 1.566) | 0.405   |
| <b>Etiology</b>      |                    |                  |                       |         |
| Alcohol              | 206 (71)           | 27 (71)          | Ref.                  | Ref.    |
| HVC                  | 18 (6)             | 5 (13)           | 1.989 (0.766 - 5.165) | 0.158   |
| Alcohol + Viral      | 8 (3)              | 0 (0)            | NA                    | 1.000   |
| MASLD                | 22 (8)             | 4 (11)           | 1.401 (0.490 - 4.003) | 0.529   |
| Other                | 35 (12)            | 2 (5)            | 0.471 (0.112 - 1.981) | 0.304   |
| Ascites at inclusion | 193 (67)           | 33 (87)          | 3.104 (1.212 - 7.952) | 0.018   |
| HE at inclusion      | 15 (5)             | 6 (16)           | 3.306 (1.381 - 7.911) | 0.007   |
| Previous infection   | 54 (19)            | 13 (34)          | 2.143 (1.096 - 4.190) | 0.026   |
| Bilirubin (mg/dL)    | 1.9 (1.2 - 2.8)    | 2.7 (1.6 - 3.5)  | 1.242 (1.106 - 1.394) | <0.001  |

|                                                        |                    |                    |                       |        |
|--------------------------------------------------------|--------------------|--------------------|-----------------------|--------|
| <b>INR</b>                                             | 1.31 (1.18 - 1.46) | 1.36 (1.24 - 1.51) | 1.014 (0.732 - 1.405) | 0.932  |
| <b>Creatinine (mg/dL)</b>                              | 0.78 (0.67 - 1.00) | 0.82 (0.69 - 0.98) | 1.070 (1.036 - 1.104) | <0.001 |
| <b>Serum Na (mEq/L)</b>                                | 137 (135 - 139)    | 136 (134 - 138)    | 0.934 (0.871 - 1.002) | 0.056  |
| <b>Leukocyte count (10<sup>3</sup>/mm<sup>3</sup>)</b> | 5.2 (4.0 - 6.7)    | 4.9 (4.0 - 6.0)    | 0.928 (0.794 - 1.084) | 0.345  |
| <b>MELD Na score</b>                                   | 13 (9 - 16)        | 16 (10 - 20)       | 1.072 (1.021 - 1.125) | 0.005  |
| <b>sPD-L1 (pg/mL)</b>                                  | 99 (77 - 128)      | 121 (91 - 152)     | 1.048 (1.016 - 1.081) | 0.003  |

**Table S9 - Multivariate analysis for factors associated with 1-year mortality in patients from Cohort 2.** Stepwise forward Cox analysis including HE, ascites, MELD Na score, leucocyte count and sPD-L1, according to its statistical significance ( $p < 0.05$ ) in univariate analysis.

| <b>Variable</b>   | <b>p value</b> | <b>HR</b>          | <b>95%CI</b>               |
|-------------------|----------------|--------------------|----------------------------|
| sPD-L1 (pg/mL)    | 0.009          | 1.046 <sup>#</sup> | 1.011 - 1.082 <sup>#</sup> |
| MELD sodium score | 0.027          | 1.062              | 1.007 - 1.120              |
| HE at inclusion   | 0.004          | 3.665              | 1.523 - 8.824              |

<sup>#</sup> HR evaluated per 10 units

HE, hepatic encephalopathy; HR, hazard ratio; MELD, model for end-stage liver disease; sPD-L1, soluble programmed death-ligand 1.

**Table S10 - Univariate analysis for factors associated to mortality in patients from Cohort 3.** Hazard ratios (HR) and corresponding 95% confidence intervals (CI) were estimated using Cox proportional hazards models. P-values correspond to the Wald test for the significance of each covariate.

| <b>Variable</b>                                 | <b>Alive<br/>(N = 344)</b> | <b>Dead<br/>(N = 56)</b> | <b>HR (95%CI)</b> | <b>p value</b> |
|-------------------------------------------------|----------------------------|--------------------------|-------------------|----------------|
| <b>Age</b>                                      | 57 (50-64)                 | 60 (53-67)               | 1.03 (1.00-1.06)  | 0.036          |
| <b>Kleiner fibrosis stage<br/>F0-1/F2/F3/F4</b> | 223/71/16/34               | 15/17/4/20               | 1.72 (1.40-2.11)  | <0.001         |
| <b>LSM (kPa)</b>                                | 5.8 (4.6-10)               | 15.9 (6.1-31.4)          | 1.02 (1.01-1.04)  | <0.001         |
| <b>Years of excessive drinking</b>              | 16 (8-26)                  | 16 (8-26)                | 1.00 (0.98-1.03)  | 0.766          |
| <b>Years of smoking</b>                         | 25 (8-40)                  | 35 (25-40)               | 1.02 (1.00-1.04)  | 0.026          |
| <b>MELD score</b>                               | 6 (6-7)                    | 7 (6-9)                  | 1.28 (1.16-1.41)  | <0.001         |
| <b>Leukocytes (10<sup>9</sup>/L)</b>            | 6.6 (5.3-8.3)              | 7.1 (5.4-8.4)            | 0.99 (0.88-1.11)  | 0.858          |
| <b>C-reactive protein (mg/L)</b>                | 2.2 (1.0-4.8)              | 3.7 (2.3-6.7)            | 1.00 (0.99-1.02)  | 0.854          |
| <b>PD-L1 (NPX)</b>                              | 5.6 (5.3-5.9)              | 6.1 (5.7-6.5)            | 3.29 (2.19-4.95)  | <0.001         |

**Table S11 - Multivariate analysis for factors associated with mortality in patients from Cohort 3.**

| <b>Variable</b> | <b>p-value</b> | <b>HR</b> | <b>95%CI</b> |
|-----------------|----------------|-----------|--------------|
| LSM (kPa)       | 0.022          | 1.01      | 1.00 - 1.03  |
| sPD-L1          | 0.002          | 2.69      | 1.44 - 5.05  |

Stepwise forward Cox analysis, according to its statistical significance ( $p < 0.05$ ) in univariate analysis. The total cohort includes 400 patients with 56 events. In this regression, 387 patients are included in a complete case analysis due to missing values of transient elastography ( $n = 13$ ) and MELD ( $n = 1$ ). HR, hazard ratio; LSM, liver stiffness measurement; MELD, model for end-stage liver disease; sPD-L1, soluble programmed death-ligand 1; TE, transient elastography.

**Table S12.- STROBE Statement.** Checklist of items that should be included in reports of cohort studies.

|                              | Item No | Recommendation                                                                                                                                                                                                                                                                                                         | Page No                             |
|------------------------------|---------|------------------------------------------------------------------------------------------------------------------------------------------------------------------------------------------------------------------------------------------------------------------------------------------------------------------------|-------------------------------------|
| <b>Title and abstract</b>    | 1       | (a) Indicate the study's design with a commonly used term in the title or the abstract<br>(b) Provide in the abstract an informative and balanced summary of what was done and what was found                                                                                                                          | 1<br>9                              |
| <b>Introduction</b>          |         |                                                                                                                                                                                                                                                                                                                        |                                     |
| Background/rationale         | 2       | Explain the scientific background and rationale for the investigation being reported                                                                                                                                                                                                                                   | 10,11                               |
| Objectives                   | 3       | State specific objectives, including any prespecified hypotheses                                                                                                                                                                                                                                                       | 11                                  |
| <b>Methods</b>               |         |                                                                                                                                                                                                                                                                                                                        |                                     |
| Study design                 | 4       | Present key elements of study design early in the paper                                                                                                                                                                                                                                                                | 12                                  |
| Setting                      | 5       | Describe the setting, locations, and relevant dates, including periods of recruitment, exposure, follow-up, and data collection                                                                                                                                                                                        | 12,13                               |
| Participants                 | 6       | (a) Give the eligibility criteria, and the sources and methods of selection of participants. Describe methods of follow-up<br>(b) For matched studies, give matching criteria and number of exposed and unexposed                                                                                                      | 12,13,<br>S1                        |
| Variables                    | 7       | Clearly define all outcomes, exposures, predictors, potential confounders, and effect modifiers. Give diagnostic criteria, if applicable                                                                                                                                                                               | 13-15                               |
| Data sources/<br>measurement | 8*      | For each variable of interest, give sources of data and details of methods of assessment (measurement). Describe comparability of assessment methods if there is more than one group                                                                                                                                   | 13-17                               |
| Bias                         | 9       | Describe any efforts to address potential sources of bias                                                                                                                                                                                                                                                              | 16,17                               |
| Study size                   | 10      | Explain how the study size was arrived at                                                                                                                                                                                                                                                                              | NA                                  |
| Quantitative variables       | 11      | Explain how quantitative variables were handled in the analyses. If applicable, describe which groupings were chosen and why                                                                                                                                                                                           | 16                                  |
| Statistical methods          | 12      | (a) Describe all statistical methods, including those used to control for confounding<br>(b) Describe any methods used to examine subgroups and interactions<br>(c) Explain how missing data were addressed<br>(d) If applicable, explain how loss to follow-up was addressed<br>(e) Describe any sensitivity analyses | 16,17<br>16,17<br>NA<br>16<br>16,17 |
| <b>Results</b>               |         |                                                                                                                                                                                                                                                                                                                        |                                     |
| Participants                 | 13*     | (a) Report numbers of individuals at each stage of study—eg numbers potentially eligible, examined for eligibility, confirmed eligible, included in the study, completing follow-up, and analysed<br>(b) Give reasons for non-participation at each stage<br>(c) Consider use of a flow diagram                        | NA<br>NA<br>NA                      |
| Descriptive data             | 14*     | (a) Give characteristics of study participants (eg demographic, clinical, social) and information on exposures and potential confounders<br>(b) Indicate number of participants with missing data for each variable of interest<br>(c) Summarise follow-up time (eg, average and total amount)                         | 18,19,<br>T1<br>NA<br>12,13,19      |
| Outcome data                 | 15*     | Report numbers of outcome events or summary measures over time                                                                                                                                                                                                                                                         | 18-21                               |



|                          |    |                                                                                                                                                                                                                                                                                                                                                                                                               |                                                    |
|--------------------------|----|---------------------------------------------------------------------------------------------------------------------------------------------------------------------------------------------------------------------------------------------------------------------------------------------------------------------------------------------------------------------------------------------------------------|----------------------------------------------------|
| Main results             | 16 | (a) Give unadjusted estimates and, if applicable, confounder-adjusted estimates and their precision (eg, 95% confidence interval). Make clear which confounders were adjusted for and why they were included<br>(b) Report category boundaries when continuous variables were categorized<br>(c) If relevant, consider translating estimates of relative risk into absolute risk for a meaningful time period | 18-21,<br>T2,T3,T4,<br>F1,F2,F3,F4<br>18<br><br>NA |
| Other analyses           | 17 | Report other analyses done—eg analyses of subgroups and interactions, and sensitivity analyses                                                                                                                                                                                                                                                                                                                | NA                                                 |
| <b>Discussion</b>        |    |                                                                                                                                                                                                                                                                                                                                                                                                               |                                                    |
| Key results              | 18 | Summarise key results with reference to study objectives                                                                                                                                                                                                                                                                                                                                                      | 21                                                 |
| Limitations              | 19 | Discuss limitations of the study, taking into account sources of potential bias or imprecision. Discuss both direction and magnitude of any potential bias                                                                                                                                                                                                                                                    | 24                                                 |
| Interpretation           | 20 | Give a cautious overall interpretation of results considering objectives, limitations, multiplicity of analyses, results from similar studies, and other relevant evidence                                                                                                                                                                                                                                    | 21-25                                              |
| Generalisability         | 21 | Discuss the generalisability (external validity) of the study results                                                                                                                                                                                                                                                                                                                                         | 21-25                                              |
| <b>Other information</b> |    |                                                                                                                                                                                                                                                                                                                                                                                                               |                                                    |
| Funding                  | 22 | Give the source of funding and the role of the funders for the present study and, if applicable, for the original study on which the present article is based                                                                                                                                                                                                                                                 | 4                                                  |
